# Supplementary material for: Mortality of ethnic minority groups in the UK: a systematic review protocol
Source: PubMed Central journal article supplement — BMJ Open. 2020 Jun 28;10(6):e034903. doi: 10.1136/bmjopen-2019-034903 (PMC7322291; doi:10.1136/bmjopen-2019-034903), 2020-06-28
Supplement: bmjopen-2019-034903.draft_revisions.pdf [file bmjopen-2019-034903.draft_revisions.pdf]

# BMJ Open

BMJ Open is committed to open peer review. As part of this commitment we make the peer review history of every article we publish publicly available.

When an article is published we post the peer reviewers' comments and the authors' responses online. We also post the versions of the paper that were used during peer review. These are the versions that the peer review comments apply to.

The versions of the paper that follow are the versions that were submitted during the peer review process. They are not the versions of record or the final published versions. They should not be cited or distributed as the published version of this manuscript.

BMJ Open is an open access journal and the full, final, typeset and author-corrected version of record of the manuscript is available on our site with no access controls, subscription charges or pay-per-view fees (<http://bmjopen.bmj.com>).

If you have any questions on BMJ Open's open peer review process please email [info.bmjopen@bmj.com](mailto:info.bmjopen@bmj.com)

# BMJ Open

## Mortality of ethnic minority groups in the United Kingdom: a systematic review protocol

|                               |                                                                                                                                                                                                                                                                                         |
|-------------------------------|-----------------------------------------------------------------------------------------------------------------------------------------------------------------------------------------------------------------------------------------------------------------------------------------|
| Journal:                      | <i>BMJ Open</i>                                                                                                                                                                                                                                                                         |
| Manuscript ID                 | bmjopen-2019-034903                                                                                                                                                                                                                                                                     |
| Article Type:                 | Protocol                                                                                                                                                                                                                                                                                |
| Date Submitted by the Author: | 10-Oct-2019                                                                                                                                                                                                                                                                             |
| Complete List of Authors:     | Stanaway, Fiona; University of Sydney, School of Public Health<br>Noguchi, Naomi; University of Sydney<br>Mathieu, Erin; The University of Sydney<br>Khalatbari-Soltani, Saman; The University of Sydney<br>Bhopal, Raj; University of Edinburgh, Centre for Population Health Sciences |
| Keywords:                     | EPIDEMIOLOGY, PUBLIC HEALTH, STATISTICS & RESEARCH METHODS                                                                                                                                                                                                                              |
|                               |                                                                                                                                                                                                                                                                                         |

SCHOLARONE™  
Manuscripts

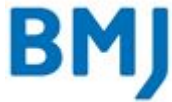

I, the Submitting Author has the right to grant and does grant on behalf of all authors of the Work (as defined in the below author licence), an exclusive licence and/or a non-exclusive licence for contributions from authors who are: i) UK Crown employees; ii) where BMJ has agreed a CC-BY licence shall apply, and/or iii) in accordance with the terms applicable for US Federal Government officers or employees acting as part of their official duties; on a worldwide, perpetual, irrevocable, royalty-free basis to BMJ Publishing Group Ltd ("BMJ") its licensees and where the relevant Journal is co-owned by BMJ to the co-owners of the Journal, to publish the Work in this journal and any other BMJ products and to exploit all rights, as set out in our [licence](#).

The Submitting Author accepts and understands that any supply made under these terms is made by BMJ to the Submitting Author unless you are acting as an employee on behalf of your employer or a postgraduate student of an affiliated institution which is paying any applicable article publishing charge ("APC") for Open Access articles. Where the Submitting Author wishes to make the Work available on an Open Access basis (and intends to pay the relevant APC), the terms of reuse of such Open Access shall be governed by a Creative Commons licence – details of these licences and which [Creative Commons](#) licence will apply to this Work are set out in our licence referred to above.

Other than as permitted in any relevant BMJ Author's Self Archiving Policies, I confirm this Work has not been accepted for publication elsewhere, is not being considered for publication elsewhere and does not duplicate material already published. I confirm all authors consent to publication of this Work and authorise the granting of this licence.

# Mortality of ethnic minority groups in the United Kingdom: a systematic review protocol

Stanaway FF<sup>1</sup>, Noguchi N<sup>1</sup>, Mathieu E<sup>1</sup>, Khalatbari-Soltani S<sup>1,2</sup>, Bhopal RS<sup>3</sup>

1. The University of Sydney School of Public Health, Faculty of Medicine and Health, University of Sydney, NSW 2006, Australia.

2. ARC Centre of Excellence in Population Aging Research (CEPAR), School of Public Health, Faculty of Medicine and Health, The University of Sydney, Sydney, Australia.

3. Usher Institute, University of Edinburgh, Teviot Place, Edinburgh, EH8 9AG, UK.

## Corresponding author:

Fiona F Stanaway

Email: [fiona.stanaway@sydney.edu.au](mailto:fiona.stanaway@sydney.edu.au)

Phone: +61-2-93514380

## Co-authors:

Naomi Noguchi: [naomi.noguchi@sydney.edu.au](mailto:naomi.noguchi@sydney.edu.au)

Erin Mathieu: [erin.mathieu@sydney.edu.au](mailto:erin.mathieu@sydney.edu.au)

Saman Khalatbari-Soltani: [saman.khalatbarisoltani@sydney.edu.au](mailto:saman.khalatbarisoltani@sydney.edu.au)

Raj Bhopal: [Raj.Bhopal@ed.ac.uk](mailto:Raj.Bhopal@ed.ac.uk)

## Abstract

### Introduction

Growing ethnic diversity in the United Kingdom has made it increasingly important to determine the presence of ethnic health inequalities. There has been no systematic review that has drawn together research on ethnic differences in mortality in the United Kingdom.

### Methods

All types of observational studies that compare all-cause mortality between major ethnic groups and the White majority population in the United Kingdom will be included. We will search Medline (Ovid SP), Embase (Ovid SP), Scopus and ISI Web of Science and search the grey literature through conference proceedings and online thesis registries. We will conduct forward and backward citation tracking of identified references and consult with experts in the field to identify further publications and ongoing or unpublished studies. Two reviewers will independently screen studies and extract data. Two reviewers will independently assess the quality of included studies using the Newcastle-Ottawa Scale. If at least two studies are located for each ethnic group and studies are sufficiently homogeneous we will conduct a meta-analysis. If insufficient studies are located or if there is high heterogeneity we will produce a narrative summary of results.

### Ethics and dissemination

As no primary data will be collected, formal ethical approval is not required. The findings of this review will be disseminated through publication in peer reviewed journals and conference presentations.

**PROSPERO registration number** TBA (submitted 06/08/2019)

## Strengths and limitations of this study

- We will include all studies comparing all-cause mortality between pre-specified ethnic groups and the White majority population in the United Kingdom
- We will conduct an extensive and sensitive search of online databases and a thorough search for unpublished studies
- Lack of data on both country of birth and ethnicity in a large number of studies may reduce our ability to conduct the planned subgroup analyses comparing the health of UK-born and overseas-born ethnic minority group members

For peer review only

## Introduction

Growing ethnic diversity in the United Kingdom (UK)<sup>1</sup> and the need to comply with legislation ensuring health for all<sup>2,3</sup> has made it increasingly important to determine the presence of health differences by ethnicity. Mortality is an important measure of overall health status and mortality differences by ethnicity and migration status are a frequent topic of research both in the UK and other countries<sup>4,5,6</sup>. Despite this, there remains little consensus on how mortality differs by ethnicity in the UK, particularly in UK-born ethnic minority individuals<sup>4,7</sup>. Part of the difficulty in understanding mortality differences between ethnic minority groups in the UK arises from variability in how ethnicity is defined in studies, with some studies using self-reported ethnicity and others using proxy measures such as country of birth or ancestry. The use of country of birth has some limitations in that it will a/ include people born overseas that are not a member of the ethnic group of interest such as White British born in India and b/ limit ethnic minority individuals to the overseas born, a population in which the healthy migrant effect is an important driver of observed health differences.

The lack of consensus around mortality differences by ethnicity in the UK is also influenced by the complexity of the comparisons, as observed mortality differences will be impacted by a number of factors including the ethnic group under study, the ethnic group being compared to and the time period. Methodological and quality differences between studies could also contribute to different findings, particularly when comparing data from cohort studies to that of unlinked census and registry-based studies. This complexity underlies the importance of conducting a systematic review that draws together all of the different pieces of research on mortality differences by ethnicity in the UK and synthesises them in a rigorous manner. A systematic review will help to provide clarity on health inequalities in terms of mortality in the UK and provide guidance for policies promoting health equity.

To the best of our knowledge, there has been no other systematic review of the relationship between ethnicity and all-cause mortality in the UK. To address this gap, we have developed a protocol for a systematic review that will identify, appraise and synthesise the evidence comparing all-cause mortality rates between major ethnic groups and the White majority population in the UK.

### Research question

The aim of this systematic review is to answer the following question: how do all-cause mortality rates differ between major ethnic groups and the White majority population in the UK? The population (P) is defined as the population of the UK, the 'risk factor' of interest (I term) is being a member of an ethnic minority population, the comparator (C term) is being a member of the White majority population and the outcome (O) is mortality.

### Methods and analysis

## Protocol design and registration

This protocol has been prepared according to the Preferred Reporting Items for Systematic reviews and Meta-analysis Protocols (PRISMA-P) statement and checklist (see online supplementary appendix 1)<sup>8</sup>. The protocol has also been registered in the PROSPERO international prospective register of systematic reviews (<http://www.crd.york.ac.uk/PROSPERO>) (number TBA). Any amendments to the protocol will be submitted to PROSPERO to establish a record of any changes and will be reported in the final published systematic review.

## Patient and public involvement

No members of the public have been involved in the research design process. We will produce plain language summaries of our results for dissemination to members of the public.

## Eligibility criteria

### Population

The population will be restricted to that of the UK and can include studies on samples in any country or region within the UK. Studies will be limited to those on population-based samples. Studies restricted to populations with a specific disease such as diabetes will be excluded.

### Ethnicity

Ethnicity can be defined by self-report or by proxy measures such as country of birth, country of birth of parents or ancestry. Table 1 shows the ethnic groups considered for inclusion in the study. These are based on ethnicity classifications used in the 2011 censuses of England and Wales, Scotland and Northern Ireland<sup>9-11</sup>. Ethnic groups selected for inclusion represent at least 0.5% of the population in any one of these three censuses. The exceptions are broad non-specific categories such as 'other White' and 'other Western European' that were considered to be too heterogeneous to be meaningful and can have varying definitions depending on the sample. Where possible, we selected ethnic group classifications from the three UK censuses that were the most specific and narrowly defined rather than a larger composite group (for example, Indian and Pakistani British/Scottish as separate categories rather than the combined South Asian British/Scottish category). However, we selected broader groupings when more narrowly defined groupings were not available (e.g. Caribbean rather than Jamaican, African rather than Ghanaian). When broader groupings are used to define ethnic categories, we have provided in the second column of Table 1 details of what other more specific groupings will be included under the umbrella of this broader category. In contrast, when smaller more specific groupings are used, we provide in column two, details of



1  
2  
3 what broader, less specific groupings would also be accepted in studies where only  
4 these broader groupings are used.  
5

6  
7 Studies that group multiple and extremely diverse ethnic groups together as one  
8 single category (such as all non-white ethnic minorities) will be excluded. Due to  
9 frequently observed differences in mortality between South Asians and East  
10 Asians<sup>4,7</sup> we will also not include data from studies using the composite group of  
11 Asian, where this group combines South Asians and East Asians as one category.  
12  
13

## 14 **Comparators**

15  
16 The comparator group is the ethnic majority population which could include any of  
17 the following groups in the UK depending on the location of the study:  
18

- 19 • White British – the majority population for the UK
- 20 • White English/Welsh – the majority population for studies in England and
- 21 Wales
- 22 • White Scottish – the majority population for studies in Scotland
- 23 • White Irish – the majority population for studies in Northern Ireland
- 24 • White – with all White or all White British ethnic groups included together
- 25 • Rest of the population – all other ethnic groups apart from the ethnic group(s)
- 26 of interest in the study
- 27
- 28
- 29
- 30

## 31 **Outcome**

32  
33 The outcome will be the all-cause mortality rate comparison by ethnicity which can  
34 be presented as a standardised mortality ratio (SMR), relative risk (RR) or hazard  
35 ratio (HR). Studies providing age adjusted beta coefficients will be included and the  
36 beta coefficients exponentiated. Studies that provide absolute measures of effect will  
37 also be included if sufficient information is provided to estimate relative measures.  
38 We will include outcomes adjusted for or stratified by a/ age and sex; b/ age, sex and  
39 socioeconomic status (SES); c/ all other confounders.  
40  
41  
42  
43

## 44 **Study types**

45  
46 Due to the frequent under-representation of ethnic minority populations in cohort  
47 studies<sup>12</sup>, we will include all observational study types that meet our PICO inclusion  
48 criteria. This will include:  
49

- 50 • Cross-sectional registry-based studies (unlinked numerator and denominator)
- 51 • Longitudinal registry-based studies (unlinked numerator and denominator)
- 52 • Cohort studies – including those involving data linkage
- 53
- 54
- 55
- 56
- 57
- 58
- 59
- 60

Table 1. Ethnic groups considered for inclusion in the systematic review

| Census category ethnic group                   | Composite/specific ethnic groups and synonyms to be accepted                                                                                 |
|------------------------------------------------|----------------------------------------------------------------------------------------------------------------------------------------------|
| British/White British                          | White                                                                                                                                        |
| English/White English                          | White                                                                                                                                        |
| Scottish/White Scottish                        | White                                                                                                                                        |
| Irish/White Irish                              | White                                                                                                                                        |
| Polish                                         | Eastern European                                                                                                                             |
| Indian/British Indian/Indian Scottish          | South Asian                                                                                                                                  |
| Pakistani/British Pakistani/Pakistani Scottish | South Asian                                                                                                                                  |
| Bangladeshi/British Bangladeshi                | South Asian/other South Asian                                                                                                                |
| Chinese/British Chinese/Chinese Scottish       | East Asian                                                                                                                                   |
| African/British African/African Scottish       | Black/African origin/Any ethnic group with an origin from any specific sub-Saharan African country (e.g. Ghanaian)                           |
| Caribbean                                      | Black/African Caribbean/West Indian/Any ethnic group with predominantly African ancestry from any specific Caribbean country (e.g. Jamaican) |
| Black Irish/Black Scottish/Black British       | Black/African origin                                                                                                                         |
| White and Black Caribbean                      | Mixed background                                                                                                                             |
| White and Asian                                | Mixed background                                                                                                                             |

## Search strategy

We will conduct searches of Medline (Ovid SP), Embase (Ovid SP), Scopus and ISI Web of Science (which includes ISI conference proceedings). We will conduct further searches of the grey literature through EThOS (the British Library e-theses online service) and ProQuest dissertations and theses: UK and Ireland. We will additionally search the NICE website and conduct searches on Google given that some material is likely to be published as government reports more readily available from the internet than in published journals. Searches will be carried out from inception to the

1  
2  
3 date of the search with no language or other restrictions. We will attempt to contact  
4 the authors of relevant studies where additional data may be available on mortality  
5 by ethnic subgroups. We will also perform forward and backward citation tracking of  
6 identified relevant articles. We will contact experts in the field for additional studies  
7 not located as part of the comprehensive search. We will also contact chief  
8 investigators of cohort studies in the UK where data on ethnicity and mortality are  
9 likely to have been collected but have not been published. The search strategy was  
10 developed by FFS in consultation with a medical librarian with expertise in  
11 conducting searches for systematic reviews. The Medline search strategy is provided  
12 in Supplementary Appendix 2.  
13  
14  
15  
16

## 17 **Data management**

18  
19 Search results will be exported into Endnote X8.2 for screening purposes. An excel  
20 spreadsheet will be used to document the selection process and will document the  
21 total number of references located by each database, the total number of references  
22 identified after removal of duplicates, the total number of references identified via  
23 grey literature searches and the number of references selected at each stage of the  
24 screening process and reasons for exclusion.  
25  
26  
27

## 28 **Selection process**

29  
30 Two authors (FFS and NN) will independently screen titles and abstracts for possible  
31 selection into the study. Any article identified by at least one author will be included  
32 in the list of full text articles to review in the second stage of article selection. Two  
33 authors (FFS and NN) will then independently review full text versions of articles  
34 selected in the screening stage to confirm their eligibility for inclusion.  
35 Disagreements will be resolved by consensus or when necessary, consultation with  
36 a third reviewer (RSB). For studies that use overlapping datasets such as registry-  
37 based studies that have overlapping time periods, the study with data over the  
38 longest period will be included. If the time periods are of equivalent length, we will  
39 select the study that includes the most recent time period.  
40  
41  
42  
43  
44

## 45 **Data extraction**

46  
47 Data will be extracted by two authors (FFS and NN) independently. Data will be  
48 entered into a data extraction form that will be pilot tested by the two authors prior to  
49 commencing data extraction. Extracted information will include: study citation, study  
50 design, study location and setting, ethnic group(s) included and method of  
51 ascertainment of ethnicity, comparison group, participant characteristics (n, mean  
52 age, sex, SES) in each group, participation rates/losses/linkage rates in each group,  
53 method of outcome ascertainment, number of events in each group, the measure of  
54 effect for mortality comparison (SMR, HR, RR) and the confidence interval or  
55 standard error. We will extract the following effect measures if available: a/  
56 SMR/HR/RR adjusted for age and stratified by or adjusted for sex; b/ HR/RR  
57  
58  
59  
60

1  
2  
3 adjusted for age and SES and stratified by or adjusted for sex; c/ HR/RR adjusted for  
4 other confounders. After completion of independent data extraction, the two authors  
5 will review both sets of extracted data together to check for errors and  
6 disagreements. Any disagreements will be resolved by consensus with the help of an  
7 additional author (EM) if necessary. Finalised data will be collated into an excel  
8 spreadsheet. For studies with missing data or with some outcome data not  
9 disaggregated by sex or particular ethnic groups, contact will be made with original  
10 authors requesting the raw data if available. Contact will also be made with  
11 investigators of major cohort studies in the UK where data on ethnicity and mortality  
12 have likely been collected but not reported in publications.  
13  
14  
15  
16

## 17 **Risk of bias assessment of individual studies**

18  
19 Study quality will be appraised independently by two authors (FFS and EM).  
20 Disagreements will be resolved by consensus or when necessary, consultation with  
21 a third reviewer (RSB). The quality of included studies will be appraised using a  
22 modified version of the Newcastle-Ottawa scale<sup>13</sup> (Supplementary Appendix 3). The  
23 risk of bias table will be grouped according to study type. For cross-sectional studies,  
24 only the first three questions under selection, the single question under comparability  
25 and the first question under outcome will be used. Some further specific details on  
26 the use of the Newcastle-Ottawa scale in this systematic review are as follows:  
27  
28  
29  
30

31 The Newcastle-Ottawa Scale will be scored using a similar approach to the  
32 Cochrane risk of bias tool, where a judgement will be made about the risk of bias  
33 being high, low or unclear. A low risk of bias will be equivalent to receiving stars for  
34 particular items as recommended in the manual for the Newcastle-Ottawa Scale.  
35 However, this modified approach will allow us to distinguish between studies that  
36 likely have a high risk of bias due to serious methodological flaws and those with  
37 unclear risk of bias due to inadequate reporting or lack of information about the  
38 likelihood of particular biases such as salmon bias<sup>14</sup> in a particular ethnic group.  
39  
40  
41

42 Other differences in the use of this scale will be as follows: in terms of comparability,  
43 we will only assess if the study adjusts for/stratifies by age and sex. In terms of  
44 ascertainment of exposure, the ideal method of exposure assessment will be self-  
45 reported ethnicity which will be given a low risk of bias assessment. Proxy measures  
46 for ethnicity such as country of birth will also receive a low risk of bias rating if there  
47 is good evidence that this is an accurate measure of ethnicity in the specific  
48 instance. As the accuracy of country of birth as a proxy measure varies by ethnic  
49 group<sup>15</sup>, in studies that include a number of different ethnic groups a judgement of  
50 risk of bias will be made for each ethnic group included in the study and provided as  
51 a supplementary file, but only a summary judgement for the study overall will be  
52 displayed in the main risk of bias table. The summary judgement will be based on  
53 the average risk of bias for exposure ascertainment across all included ethnic  
54 groups.  
55  
56  
57  
58  
59  
60

1  
2  
3 We will add an additional domain of other bias to incorporate the problem of  
4 numerator/denominator mismatch that can occur in unlinked registry-based studies.  
5 The likelihood of this bias being present will be judged according to publications  
6 reporting the likelihood of this bias in UK data for specific ethnic groups in addition to  
7 the information provided in the included studies. For studies using data linkage,  
8 reported linkage rates will be used as part of the judgement of numerator-  
9 denominator bias. Similar to exposure ascertainment, numerator-denominator bias  
10 may differ between ethnic groups, and when this is likely a risk of bias judgement will  
11 be made for each ethnic group separately, but only a summary judgement for the  
12 study overall will be displayed in the main table.  
13  
14  
15  
16

## 17 **Quality of evidence for individual ethnic groups**

18  
19 We will examine the quality of the body of evidence for mortality differences for each  
20 ethnic group using GRADE criteria<sup>16</sup>. This will include consideration of risk of bias  
21 assessment (with consideration given to the specific risk of bias assessment for  
22 individual ethnic groups in terms of exposure ascertainment, linkage rates etc),  
23 inconsistency of results, indirectness of evidence, imprecision and publication bias.  
24  
25  
26

## 27 **Data synthesis**

28  
29 Data synthesis will be carried out by author SKS using a random effects model. We  
30 will only conduct quantitative synthesis if we locate at least two studies for a  
31 particular ethnic group and if there is sufficient homogeneity to enable meaningful  
32 synthesis as detailed below in the section on subgroup analysis and investigation of  
33 heterogeneity. In the absence of a quantitative synthesis we will provide a narrative  
34 synthesis of results by ethnic group. Quantitative synthesis of age adjusted results  
35 will be stratified by sex and ethnic group. We will conduct additional quantitative  
36 synthesis of results adjusted for age and SES also stratified by sex and ethnic group  
37 if available data permits. If data extracted are adjusted for rather than stratified by  
38 sex, we will summarise this additional data narratively and provide the results in the  
39 appendices. If extracted effect measures are adjusted for other potential  
40 confounders in addition to age and sex such as health behaviours and comorbidities  
41 we will summarise this information narratively and provide the data in the  
42 appendices.  
43  
44  
45  
46  
47  
48

49 Given the likely diversity in measures of effects used between unlinked registry  
50 studies and cohort studies we will treat standardised mortality ratios, hazard ratios  
51 and relative risks as equivalent measures of effect. As event rates are likely to be  
52 low in population-based samples including in the non-exposed group, the hazard  
53 ratio and relative risk should be equivalent<sup>17</sup>. In addition, as the proportion of most  
54 ethnic minority populations included in the analysis will range between 0.5-2.5%, the  
55 standardised mortality ratio is less likely to be a biased representation of the relative  
56 risk as the exposure rate (ethnicity) is low<sup>18</sup>. However, given that the standardised  
57 mortality ratio can be biased when both age-specific mortality ratios and population  
58  
59  
60

1  
2  
3 age distribution differs between ethnic groups<sup>19</sup>, we will include consideration of  
4 difference in effect measures in our assessment of heterogeneity as discussed  
5 below. We will screen for publication bias using a funnel plot and Begg's test<sup>20</sup> if at  
6 least 10 studies are located for a particular quantitative synthesis. We will also  
7 investigate publication bias by sub-group analysis comparing results of published  
8 and unpublished data if sufficient data are available.  
9

10  
11  
12 Where data sources for a single ethnic group include disparate time periods, we will  
13 arrange studies by date and then conduct a random-effects cumulative meta-  
14 analysis to examine how comparative mortality estimates evolve over time. If data is  
15 available on both country of birth and self-reported ethnicity from included studies,  
16 we will conduct subgroup analyses within ethnic groups by country of birth (UK- vs  
17 overseas-born). The need for this subgroup analysis is based on the need to account  
18 for the healthy migrant effect as a potential underlying cause of observed differences  
19 in mortality rates and the importance of understanding if there are differences in  
20 mortality between overseas-born and UK-born ethnic minority group members. We  
21 also plan subgroup analyses based on different comparison populations (e.g. White  
22 British, White Scottish, White Irish). This is due to frequently poorer observed health  
23 in White Scottish and White Irish populations compared to White British populations<sup>4</sup>.  
24 Therefore, using the White Scottish or White Irish populations as the comparator  
25 group in studies based in Scotland or Northern Ireland, could alter the pattern of  
26 observed ethnic differences. If sufficient high-quality cohort studies are located, we  
27 will also conduct sensitivity analyses restricted to these high-quality studies with  
28 results from cross-sectional studies and unlinked registry studies removed. If high  
29 heterogeneity is observed, we will investigate whether this is reduced by conducting  
30 the prespecified subgroup and sensitivity analyses listed below.  
31  
32  
33  
34  
35  
36

### 37 **Investigation of heterogeneity**

38  
39  
40 We will assess for the presence of heterogeneity using Cochran's Q and the I<sup>2</sup>  
41 Statistic<sup>21</sup>. If we observe an I<sup>2</sup> value of 50% or more, we will explore possible  
42 explanations for the observed heterogeneity in subgroup and sensitivity analyses as  
43 follows:  
44  
45

#### 46 **Subgroup analyses**

- 47 1. Method of ethnicity ascertainment between studies – country of birth vs self-  
48 reported ethnicity vs other methods.
- 49 2. Definition/included groups in one major ethnic group – e.g. South Asian vs  
50 subgroups of Indian, Pakistani, Bangladeshi.
- 51 3. Comparison population – e.g. White majority population in England and Wales vs  
52 White Scottish population in Scotland.
- 53 4. Measure of effect – standardised mortality ratio vs hazard ratio or relative risk.  
54  
55  
56  
57

#### 58 **Sensitivity analyses**



1. Study design – non-cohort studies removed.
2. Risk of bias – within cohort studies only, studies with high risk of bias will be removed.

If any of the above are identified as a plausible explanation of the observed heterogeneity, we will conduct a quantitative synthesis at the subgroup level if sufficient studies are available. If insufficient studies are available, we will summarise the results of studies narratively.

In addition to the abovementioned subgroup analyses that will be conducted to investigate heterogeneity, if sufficient data are available, we will also conduct the following subgroup analyses:

### **Additional subgroup analyses**

1. UK-born versus overseas-born within each ethnic group to examine the contribution of the healthy migrant effect to observed differences in mortality by ethnicity.
2. Published versus unpublished results within each ethnic group to examine the presence of publication bias.

### **Ethics and dissemination**

To our knowledge, the proposed systematic review will be the first to systematically collect and synthesise evidence on mortality differences between the major ethnic groups in the UK. The results of the review will provide important evidence about health inequalities and provide important guidance for policies promoting health equity. It is also likely that the review will identify important gaps in the knowledge base such as a lack of research in particular ethnic groups or insufficient evidence in terms of differences in mortality between UK-born and overseas-born members of particular ethnic minority groups.

On completion of the review, we will implement a robust knowledge translation strategy that will include publication in peer-reviewed journals with selection of an open access format where possible, presentation of results at relevant conferences, and production of plain language summaries for dissemination of results to members of the public.

### **References**

1. Office for National Statistics. Ethnicity and National Identity in England and Wales: 2011 2012 [Available from: <https://www.ons.gov.uk/peoplepopulationandcommunity/culturalidentity/ethnicity/articles/ethnicityandnationalidentityinenglandandwales/2012-12-11>].
2. Siva N. Race relations in the UK's National Health Service. *Lancet*. 2009;373(9679):1935-6.

3. Sealy-Jefferson S, Vickers J, Elam A, Wilson MR. Racial and Ethnic Health Disparities and the Affordable Care Act: a Status Update. *J Racial Ethn Health*. 2015;2(4):583-8.
4. Bhopal RS, Gruer L, Cezard G et al. Mortality, ethnicity, and country of birth on a national scale, 2001-2013: A retrospective cohort (Scottish Health and Ethnicity Linkage Study). *PLOS Medicine*. 2018;15(3):e1002515.  
<https://doi.org/10.1371/journal.pmed.1002515>
5. Marmot MG, Adelstein AM, Bulusu L. Lessons from the study of immigrant mortality. *Lancet* 1984; 1:1455-7.
6. Stanaway FF, Blyth FM, Naganathan V et al. Mortality paradox of older Italian-born men in Australia: the Concord Health and Ageing in Men Project. *J Immigr Minor Health*. 2019. doi:10.1007/s10903-019-00874-2
7. Scott A, Timaeus IM. Mortality differentials 1991-2005 by self-reported ethnicity: findings from the ONS Longitudinal Study. *J Epidemiol Community Health* 2013;67:743-750. doi:10.1136/jech-2012-202265
8. Shamseer L, Moher D, Clarke M et al. Preferred reporting items for systematic review and meta-analysis protocols (PRISMA-P) 2015: elaboration and explanation. *BMJ* 2015;349:g7647. doi:10.1136/bmj.g7647
9. Office for National Statistics. 2011 Census: Ethnic group (write-in responses), local authorities in England and Wales.  
<https://www.ons.gov.uk/census/2011census> [Accessed 06 June 2019]
10. National Records of Scotland. Scotland's Census 2011. Table K2310SC Ethnic group. <https://www.scotlandscensus.gov.uk/census-results> [Accessed 06 June 2019]
11. Census Office for Northern Ireland. 2011 Census in Northern Ireland. Ethnic Group full detail: QS201NI. <https://www.nisra.gov.uk/statistics/2011-census/results> [Accessed 06 June 2019]
12. Ranganathan M, Bhopal R. Exclusion and inclusion of Nonwhite ethnic minority groups in 72 North American and European cardiovascular cohort studies. *PLOS Medicine* 2006. <https://doi.org/10.1371/journal.pmed.0030044>
13. Wells GA, Shea B, O'Connell D, Peterson J, Welch V, Losos M, et al. The Newcastle-Ottawa Scale (NOS) for assessing the quality if nonrandomized studies in meta-analyses. Available from:  
URL: [http://www.ohri.ca/programs/clinical\\_epidemiology/oxford.htm](http://www.ohri.ca/programs/clinical_epidemiology/oxford.htm) [Accessed 05 August 2019]
14. Razum O, Zeeb H, Rohrmann S. The 'healthy migrant effect' – not merely a fallacy of inaccurate denominator figures. *Int J Epidemiol* 2000; 29:191-2
15. Bhopal RS. Migration, ethnicity, race, and health in multicultural societies. Second edition. Oxford: Oxford University Press; 2014:p79.
16. Guyatt GH, Oxman AD, Vist GE et al. GRADE: an emerging consensus on rating quality of evidence and strength of recommendations. *BMJ*. 2008;336(7650):924-6.
17. Perneger TV. Estimating the relative hazard by the ratio of logarithms of event-free proportions. *Contemporary Clinical Trials*. 2008;29:762-766
18. Jones ME, Swerdlow AJ. Bias in the standardized mortality ratio when using general population rates to estimate expected number of deaths. *Am J Epidemiol* 1998;148:1012-7
19. Tsai SP, Wen CP. A review of methodological issues of the standardized mortality ratio (SMR) in occupational cohort studies. *Int J Epidemiol* 1986;15:8-21



- 1  
2  
3 20. Egger M, Davey Smith G, Schneider M, Minder C. Bias in meta-analysis detected  
4 by a simple, graphical test. *BMJ*. 1997;315:629-34  
5  
6 21. Higgins JPT, Altman DG, Sterne JAC. Chapter 9: Analysing data and undertaking  
7 meta-analysis. In: Higgins JP, Green S, (editors). *Cochrane Handbook for*  
8 *Systematic Reviews of Interventions* Version 5.1.0 (updated March 2011). The  
9 Cochrane Collaboration, 2011.  
10

### 11 **Authors' contributions**

12  
13  
14 The protocol was drafted by FFS in consultation with the other authors in terms of  
15 ethnic groups to be included, literature search strategy, risk of bias assessment and  
16 data synthesis. All authors approved the final version of the protocol.  
17

### 18 **Funding statement**

19  
20  
21 Open access fees were covered by financial support from the School of Public  
22 Health Academic Support Scheme. The School of Public Health had no role in  
23 developing the protocol.  
24

### 25 **Competing interests**

26  
27  
28 None of the authors declare any competing interests  
29

30 **Word count** 3507  
31

### 32 **Supplementary files**

33  
34 Appendix 1: PRISMA-P checklist  
35

36 Appendix 2: Example search strategy in Ovid MEDLINE  
37

38 Appendix 3: Newcastle-Ottawa scale  
39  
40  
41  
42  
43  
44  
45  
46  
47  
48  
49  
50  
51  
52  
53  
54  
55  
56  
57  
58  
59  
60

## PRISMA- P 2015 Checklist

This checklist has been adapted for use with protocol submissions to *Systematic Reviews* from Table 3 in Moher D et al: Preferred reporting items for systematic review and meta-analysis protocols (PRISMA-P) 2015 statement. *Systematic Reviews* 2015 4:1

| Section/topic                     | #  | Checklist item                                                                                                                                                                                  | Information reported                |                          | Page number(s)                                                                |
|-----------------------------------|----|-------------------------------------------------------------------------------------------------------------------------------------------------------------------------------------------------|-------------------------------------|--------------------------|-------------------------------------------------------------------------------|
|                                   |    |                                                                                                                                                                                                 | Yes                                 | No                       |                                                                               |
| <b>ADMINISTRATIVE INFORMATION</b> |    |                                                                                                                                                                                                 |                                     |                          |                                                                               |
| <b>Title</b>                      |    |                                                                                                                                                                                                 |                                     |                          |                                                                               |
| Identification                    | 1a | Identify the report as a protocol of a systematic review                                                                                                                                        | <input checked="" type="checkbox"/> | <input type="checkbox"/> | 1                                                                             |
| Update                            | 1b | If the protocol is for an update of a previous systematic review, identify as such                                                                                                              | <input type="checkbox"/>            | <input type="checkbox"/> | n/a                                                                           |
| <b>Registration</b>               | 2  | If registered, provide the name of the registry (e.g., PROSPERO) and registration number in the Abstract                                                                                        | <input checked="" type="checkbox"/> | <input type="checkbox"/> | 2 (awaiting confirmation of registration from Prospero, submitted 06/08/2019) |
| <b>Authors</b>                    |    |                                                                                                                                                                                                 |                                     |                          |                                                                               |
| Contact                           | 3a | Provide name, institutional affiliation, and e-mail address of all protocol authors; provide physical mailing address of corresponding author                                                   | <input checked="" type="checkbox"/> | <input type="checkbox"/> | 1                                                                             |
| Contributions                     | 3b | Describe contributions of protocol authors and identify the guarantor of the review                                                                                                             | <input checked="" type="checkbox"/> | <input type="checkbox"/> | 14                                                                            |
| <b>Amendments</b>                 | 4  | If the protocol represents an amendment of a previously completed or published protocol, identify as such and list changes; otherwise, state plan for documenting important protocol amendments | <input checked="" type="checkbox"/> | <input type="checkbox"/> | 5                                                                             |
| <b>Support</b>                    |    |                                                                                                                                                                                                 |                                     |                          |                                                                               |
| Sources                           | 5a | Indicate sources of financial or other support for the review                                                                                                                                   | <input checked="" type="checkbox"/> | <input type="checkbox"/> | 14                                                                            |
| Sponsor                           | 5b | Provide name for the review funder and/or sponsor                                                                                                                                               | <input checked="" type="checkbox"/> | <input type="checkbox"/> | 14                                                                            |
| Role of sponsor/funder            | 5c | Describe roles of funder(s), sponsor(s), and/or institution(s), if any, in developing the protocol                                                                                              | <input checked="" type="checkbox"/> | <input type="checkbox"/> | 14                                                                            |
| <b>INTRODUCTION</b>               |    |                                                                                                                                                                                                 |                                     |                          |                                                                               |

| Section/topic                             | #   | Checklist item                                                                                                                                                                                                            | Information reported                |                          | Page number(s)           |
|-------------------------------------------|-----|---------------------------------------------------------------------------------------------------------------------------------------------------------------------------------------------------------------------------|-------------------------------------|--------------------------|--------------------------|
|                                           |     |                                                                                                                                                                                                                           | Yes                                 | No                       |                          |
| <b>Rationale</b>                          | 6   | Describe the rationale for the review in the context of what is already known                                                                                                                                             | <input checked="" type="checkbox"/> | <input type="checkbox"/> | 4                        |
| <b>Objectives</b>                         | 7   | Provide an explicit statement of the question(s) the review will address with reference to participants, interventions, comparators, and outcomes (PICO)                                                                  | <input checked="" type="checkbox"/> | <input type="checkbox"/> | 4                        |
| <b>METHODS</b>                            |     |                                                                                                                                                                                                                           |                                     |                          |                          |
| <b>Eligibility criteria</b>               | 8   | Specify the study characteristics (e.g., PICO, study design, setting, time frame) and report characteristics (e.g., years considered, language, publication status) to be used as criteria for eligibility for the review | <input checked="" type="checkbox"/> | <input type="checkbox"/> | 5-7                      |
| <b>Information sources</b>                | 9   | Describe all intended information sources (e.g., electronic databases, contact with study authors, trial registers, or other grey literature sources) with planned dates of coverage                                      | <input checked="" type="checkbox"/> | <input type="checkbox"/> | 7,8                      |
| <b>Search strategy</b>                    | 10  | Present draft of search strategy to be used for at least one electronic database, including planned limits, such that it could be repeated                                                                                | <input checked="" type="checkbox"/> | <input type="checkbox"/> | Supplementary Appendix 2 |
| <b>STUDY RECORDS</b>                      |     |                                                                                                                                                                                                                           |                                     |                          |                          |
| <b>Data management</b>                    | 11a | Describe the mechanism(s) that will be used to manage records and data throughout the review                                                                                                                              | <input checked="" type="checkbox"/> | <input type="checkbox"/> | 8, 9                     |
| <b>Selection process</b>                  | 11b | State the process that will be used for selecting studies (e.g., two independent reviewers) through each phase of the review (i.e., screening, eligibility, and inclusion in meta-analysis)                               | <input checked="" type="checkbox"/> | <input type="checkbox"/> | 8                        |
| <b>Data collection process</b>            | 11c | Describe planned method of extracting data from reports (e.g., piloting forms, done independently, in duplicate), any processes for obtaining and confirming data from investigators                                      | <input checked="" type="checkbox"/> | <input type="checkbox"/> | 8,9                      |
| <b>Data items</b>                         | 12  | List and define all variables for which data will be sought (e.g., PICO items, funding sources), any pre-planned data assumptions and simplifications                                                                     | <input checked="" type="checkbox"/> | <input type="checkbox"/> | 8, 9                     |
| <b>Outcomes and prioritization</b>        | 13  | List and define all outcomes for which data will be sought, including prioritization of main and additional outcomes, with rationale                                                                                      | <input checked="" type="checkbox"/> | <input type="checkbox"/> | 8, 9                     |
| <b>Risk of bias in individual studies</b> | 14  | Describe anticipated methods for assessing risk of bias of individual studies, including whether this will be done at the outcome or study level, or both; state how this information will be used in data synthesis      | <input checked="" type="checkbox"/> | <input type="checkbox"/> | 9-11                     |
| <b>DATA</b>                               |     |                                                                                                                                                                                                                           |                                     |                          |                          |
| <b>Synthesis</b>                          | 15a | Describe criteria under which study data will be quantitatively synthesized                                                                                                                                               | <input checked="" type="checkbox"/> | <input type="checkbox"/> | 10-12                    |

| Section/topic                            | #   | Checklist item                                                                                                                                                                                                                              | Information reported                |                          | Page number(s) |
|------------------------------------------|-----|---------------------------------------------------------------------------------------------------------------------------------------------------------------------------------------------------------------------------------------------|-------------------------------------|--------------------------|----------------|
|                                          |     |                                                                                                                                                                                                                                             | Yes                                 | No                       |                |
|                                          | 15b | If data are appropriate for quantitative synthesis, describe planned summary measures, methods of handling data, and methods of combining data from studies, including any planned exploration of consistency (e.g., $I^2$ , Kendall's tau) | <input checked="" type="checkbox"/> | <input type="checkbox"/> | 10-12          |
|                                          | 15c | Describe any proposed additional analyses (e.g., sensitivity or subgroup analyses, meta-regression)                                                                                                                                         | <input checked="" type="checkbox"/> | <input type="checkbox"/> | 11,12          |
|                                          | 15d | If quantitative synthesis is not appropriate, describe the type of summary planned                                                                                                                                                          | <input checked="" type="checkbox"/> | <input type="checkbox"/> | 11,12          |
| <b>Meta-bias(es)</b>                     | 16  | Specify any planned assessment of meta-bias(es) (e.g., publication bias across studies, selective reporting within studies)                                                                                                                 | <input checked="" type="checkbox"/> | <input type="checkbox"/> | 11,12          |
| <b>Confidence in cumulative evidence</b> | 17  | Describe how the strength of the body of evidence will be assessed (e.g., GRADE)                                                                                                                                                            | <input checked="" type="checkbox"/> | <input type="checkbox"/> | 10             |

## Appendix 2

### Medline (Ovid SP) search

| #  | Search Terms                    |
|----|---------------------------------|
| 1  | exp United Kingdom/             |
| 2  | england*.mp.                    |
| 3  | scotland*.mp.                   |
| 4  | northern ireland.mp.            |
| 5  | wales.mp.                       |
| 6  | united kingdom.mp.              |
| 7  | britain.mp.                     |
| 8  | 1 or 2 or 3 or 4 or 5 or 6 or 7 |
| 9  | exp Ethnic Groups/              |
| 10 | exp Minority Groups/            |
| 11 | exp "Transients and Migrants"/  |
| 12 | exp "Emigrants and Immigrants"/ |
| 13 | polish.mp.                      |
| 14 | indian.mp.                      |
| 15 | pakistan*.mp.                   |

|    |                                                                                 |
|----|---------------------------------------------------------------------------------|
| 16 | bangladesh*.mp.                                                                 |
| 17 | chinese.mp.                                                                     |
| 18 | african.mp.                                                                     |
| 19 | caribbean.mp.                                                                   |
| 20 | black.mp.                                                                       |
| 21 | mixed.mp.                                                                       |
| 22 | ethnic*.mp.                                                                     |
| 23 | 9 or 10 or 11 or 12 or 13 or 14 or 15 or 16 or 17 or 18 or 19 or 20 or 21 or 22 |
| 24 | exp Mortality/                                                                  |
| 25 | exp Death/                                                                      |
| 26 | mortal*.mp.                                                                     |
| 27 | 24 or 25 or 26                                                                  |
| 28 | 8 and 23 and 27                                                                 |

## Appendix 3

### Newcastle-Ottawa quality assessment scale with modifications and assessment criteria described

| Question                                                                           | Risk of bias assessment | Criteria for risk of bias assessment                                                                                                                                   |
|------------------------------------------------------------------------------------|-------------------------|------------------------------------------------------------------------------------------------------------------------------------------------------------------------|
| <b>Selection</b>                                                                   |                         |                                                                                                                                                                        |
| <b>1. Representativeness of the exposed sample</b>                                 | Low                     | Representative of members of the respective ethnic minority group (census-based whole population sample or cross-sectional/cohort study with high participation rates) |
|                                                                                    | High                    | Selected group such as nurses, volunteers                                                                                                                              |
|                                                                                    | Unclear                 | No description of derivation of exposed sample                                                                                                                         |
| <b>2. Selection of non-exposed sample</b>                                          | Low                     | Drawn from the same community as the exposed sample/similar participation rates as the exposed sample                                                                  |
|                                                                                    | High                    | Drawn from a different source to the exposed sample                                                                                                                    |
|                                                                                    | Unclear                 | No description of derivation of exposed sample                                                                                                                         |
| <b>3. Ascertainment of exposure</b>                                                | Low                     | Self-reported ethnicity. Proxy measures of ethnicity (country of birth, country of birth of parents, ancestry) if evidence they are accurate measures of ethnicity     |
|                                                                                    | High                    | Proxy measures of ethnicity that are not accurate measures of self-reported ethnicity                                                                                  |
|                                                                                    | Unclear                 | Method of exposure ascertainment not described OR proxy measure used and no data available on accuracy as a measure of self-reported ethnicity                         |
| <b>4. Demonstration that outcome of interest was no present at start of study*</b> | Low                     | Outcome not present at start of study                                                                                                                                  |
|                                                                                    | High                    | Outcome present at start of study                                                                                                                                      |
|                                                                                    | Unclear                 | Unable to determine if outcome present at start of study                                                                                                               |
| <b>Comparability</b>                                                               |                         |                                                                                                                                                                        |
| <b>1. Comparability of cohorts on the basis of the design or analysis</b>          | Low                     | Effect measures are adjusted/stratified by age and sex                                                                                                                 |
|                                                                                    | High                    | Effect measures are not adjusted/stratified by age and sex                                                                                                             |
|                                                                                    | Unclear                 | Unclear if effect measures have been adjusted for age/sex                                                                                                              |
| <b>Outcome</b>                                                                     |                         |                                                                                                                                                                        |
| <b>1. Assessment of outcome</b>                                                    | Low                     | Independent blind assessment of outcome or record linkage                                                                                                              |
|                                                                                    | High                    | Self-report                                                                                                                                                            |
|                                                                                    | Unclear                 | Method of outcome assessment not described                                                                                                                             |

|                                                            |         |                                                                                                                                                                                                                         |
|------------------------------------------------------------|---------|-------------------------------------------------------------------------------------------------------------------------------------------------------------------------------------------------------------------------|
| <b>2. Was follow-up long enough for outcomes to occur*</b> | Low     | At least 24 months of follow-up or shorter period with high event rates (older population)                                                                                                                              |
|                                                            | High    | Less than 24 months of follow-up and low event rates                                                                                                                                                                    |
|                                                            | Unclear | Length of follow up not reported                                                                                                                                                                                        |
| <b>3. Adequacy of follow up*</b>                           | Low     | No or small loss to follow up, losses even between comparison groups                                                                                                                                                    |
|                                                            | High    | Large loss to follow up that has potential to change estimate of effect (determined by worst-case best-case analysis) OR losses uneven between comparison groups                                                        |
|                                                            | Unclear | Losses not reported                                                                                                                                                                                                     |
| <b>Other bias</b>                                          |         |                                                                                                                                                                                                                         |
| <b>1. Numerator-denominator bias/linkage rates</b>         | Low     | Low proportion of migrants in ethnic group <20% OR evidence that missed overseas deaths are low OR high rates of data linkage that are equal between comparison groups                                                  |
|                                                            | High    | High proportion of migrants in ethnic group AND evidence that likelihood of missed overseas deaths is high and likely to change reported estimates, OR high rates of unlinked participants that differs by ethnic group |
|                                                            | Unclear | No information on proportion of migrants in ethnic group, likelihood of missed overseas deaths, or rates of data linkage                                                                                                |

\*Not assessed in cross-sectional studies

Peer review only



**Fiona Stanaway**

---

**From:** CRD-REGISTER <irss505@york.ac.uk>  
**Sent:** Tuesday, 6 August 2019 12:11 PM  
**To:** Fiona Stanaway  
**Subject:** PROSPERO acknowledgement of receipt [146143]

Dear Registrant,

Thank you for submitting details of your systematic review for registration in PROSPERO.

We will check the information supplied to

- make sure that your systematic review is within scope
- ensure that the fields have been completed appropriately.

PLEASE NOTE THAT THESE CHECKS DO NOT CONSTITUTE PEER REVIEW OR IMPLY APPROVAL OF YOUR SYSTEMATIC REVIEW METHODS.

We will let you know when your record has been published on PROSPERO, or alternatively ask for further information or clarification. If your application is rejected we will advise you of the reasons for non-publication (usually this will be if your review is out of scope).

With the current very high demand for registration, we aim to respond within 10 working days for UK submissions and 20 working days for submissions outside the UK.

We will process your application as soon as possible. During this time the record will be locked and you will not be able to access it.

Please note that this does not stop you working on your review.

Yours sincerely,  
PROSPERO Administrator  
Centre for Reviews and Dissemination  
University of York  
York YO10 5DD  
t: +44 (0) 1904 321049  
e: CRD-register@york.ac.uk  
www.york.ac.uk/inst/crd

# BMJ Open

## Mortality of ethnic minority groups in the United Kingdom: a systematic review protocol

|                                 |                                                                                                                                                                                                                                                                                         |
|---------------------------------|-----------------------------------------------------------------------------------------------------------------------------------------------------------------------------------------------------------------------------------------------------------------------------------------|
| Journal:                        | <i>BMJ Open</i>                                                                                                                                                                                                                                                                         |
| Manuscript ID                   | bmjopen-2019-034903.R1                                                                                                                                                                                                                                                                  |
| Article Type:                   | Protocol                                                                                                                                                                                                                                                                                |
| Date Submitted by the Author:   | 13-Feb-2020                                                                                                                                                                                                                                                                             |
| Complete List of Authors:       | Stanaway, Fiona; University of Sydney, School of Public Health<br>Noguchi, Naomi; University of Sydney<br>Mathieu, Erin; The University of Sydney<br>Khalatbari-Soltani, Saman; The University of Sydney<br>Bhopal, Raj; University of Edinburgh, Centre for Population Health Sciences |
| <b>Primary Subject Heading</b>: | Public health                                                                                                                                                                                                                                                                           |
| Secondary Subject Heading:      | Epidemiology                                                                                                                                                                                                                                                                            |
| Keywords:                       | EPIDEMIOLOGY, PUBLIC HEALTH, STATISTICS & RESEARCH METHODS                                                                                                                                                                                                                              |
|                                 |                                                                                                                                                                                                                                                                                         |

SCHOLARONE™  
Manuscripts



I, the Submitting Author has the right to grant and does grant on behalf of all authors of the Work (as defined in the below author licence), an exclusive licence and/or a non-exclusive licence for contributions from authors who are: i) UK Crown employees; ii) where BMJ has agreed a CC-BY licence shall apply, and/or iii) in accordance with the terms applicable for US Federal Government officers or employees acting as part of their official duties; on a worldwide, perpetual, irrevocable, royalty-free basis to BMJ Publishing Group Ltd ("BMJ") its licensees and where the relevant Journal is co-owned by BMJ to the co-owners of the Journal, to publish the Work in this journal and any other BMJ products and to exploit all rights, as set out in our [licence](#).

The Submitting Author accepts and understands that any supply made under these terms is made by BMJ to the Submitting Author unless you are acting as an employee on behalf of your employer or a postgraduate student of an affiliated institution which is paying any applicable article publishing charge ("APC") for Open Access articles. Where the Submitting Author wishes to make the Work available on an Open Access basis (and intends to pay the relevant APC), the terms of reuse of such Open Access shall be governed by a Creative Commons licence – details of these licences and which [Creative Commons](#) licence will apply to this Work are set out in our licence referred to above.

Other than as permitted in any relevant BMJ Author's Self Archiving Policies, I confirm this Work has not been accepted for publication elsewhere, is not being considered for publication elsewhere and does not duplicate material already published. I confirm all authors consent to publication of this Work and authorise the granting of this licence.

# Mortality of ethnic minority groups in the United Kingdom: a systematic review protocol

Stanaway FF<sup>1</sup>, Noguchi N<sup>1</sup>, Mathieu E<sup>1</sup>, Khalatbari-Soltani S<sup>1,2</sup>, Bhopal R<sup>3</sup>

1. The University of Sydney School of Public Health, Faculty of Medicine and Health, University of Sydney, NSW 2006, Australia.

2. ARC Centre of Excellence in Population Aging Research (CEPAR), School of Public Health, Faculty of Medicine and Health, The University of Sydney, Sydney, Australia.

3. Usher Institute, University of Edinburgh, Teviot Place, Edinburgh, EH8 9AG, UK.

## Corresponding author:

Fiona F Stanaway

Email: [fiona.stanaway@sydney.edu.au](mailto:fiona.stanaway@sydney.edu.au)

Phone: +61-2-93514380

## Co-authors:

Naomi Noguchi: [naomi.noguchi@sydney.edu.au](mailto:naomi.noguchi@sydney.edu.au)

Erin Mathieu: [erin.mathieu@sydney.edu.au](mailto:erin.mathieu@sydney.edu.au)

Saman Khalatbari-Soltani: [saman.khalatbarisoltani@sydney.edu.au](mailto:saman.khalatbarisoltani@sydney.edu.au)

Raj Bhopal: [Raj.Bhopal@ed.ac.uk](mailto:Raj.Bhopal@ed.ac.uk)

## Abstract

### Introduction

Growing ethnic diversity in the United Kingdom has made it increasingly important to determine the presence of ethnic health inequalities. There has been no systematic review that has drawn together research on ethnic differences in mortality in the United Kingdom.

### Methods

All types of observational studies that compare all-cause mortality between major ethnic groups and the White majority population in the United Kingdom will be included. We will search Medline (Ovid SP), Embase (Ovid SP), Scopus and ISI Web of Science and search the grey literature through conference proceedings and online thesis registries. We will conduct forward and backward citation tracking of identified references and consult with experts in the field to identify further publications and ongoing or unpublished studies. Two reviewers will independently screen studies and extract data. Two reviewers will independently assess the quality of included studies using the Newcastle-Ottawa Scale. If at least two studies are located for each ethnic group and studies are sufficiently homogeneous we will conduct a meta-analysis. If insufficient studies are located or if there is high heterogeneity we will produce a narrative summary of results.

### Ethics and dissemination

As no primary data will be collected, formal ethical approval is not required. The findings of this review will be disseminated through publication in peer reviewed journals and conference presentations.

**PROSPERO registration number** CRD42019146143

[https://www.crd.york.ac.uk/prospero/display\\_record.php?ID=CRD42019146143](https://www.crd.york.ac.uk/prospero/display_record.php?ID=CRD42019146143)

## Strengths and limitations of this study

- We will include all studies comparing all-cause mortality between pre-specified ethnic groups and the White majority population in the United Kingdom
- We will conduct an extensive and sensitive search of online databases and a thorough search for unpublished studies
- We will examine the extent to which country of birth and socio-economic status contribute to ethnic inequalities in mortality
- Lack of data on both country of birth and ethnicity in a large number of studies may reduce our ability to conduct the planned subgroup analyses comparing the health of UK-born and overseas-born ethnic minority group members

## Introduction

Growing ethnic diversity in the United Kingdom (UK)<sup>1</sup> and the need to comply with legislation ensuring health for all<sup>2,3</sup> has made it increasingly important to determine the presence of health differences by ethnicity. Mortality is an important measure of overall health status and mortality differences by ethnicity and migration status are a frequent topic of research both in the UK and other countries<sup>4,5,6</sup>. Despite this, there remains little consensus on how mortality differs by ethnicity in the UK, particularly in UK-born ethnic minority individuals<sup>4,7</sup>. Part of the difficulty in understanding mortality differences between ethnic minority groups in the UK arises from variability in how ethnicity is defined in studies, with some studies using self-reported ethnicity and others using proxy measures such as country of birth or ancestry. The use of country of birth has some limitations in that it will a/ include people born overseas that are not a member of the ethnic group of interest such as White British born in India and b/ limit ethnic minority individuals to the overseas born, a population in which the healthy migrant effect is an important driver of observed health differences.

The lack of consensus around mortality differences by ethnicity in the UK is also influenced by the complexity of the comparisons, as observed mortality differences will be impacted by a number of factors including the ethnic group under study, the ethnic group being compared to and the time period. Methodological and quality differences between studies could also contribute to different findings, particularly when comparing data from cohort studies to that of unlinked census and registry-based studies. There has also been very little exploration and as a result, limited consensus on what the underlying drivers of mortality differences by ethnicity in the UK might be. Place of birth (in particular being born overseas compared to being born in the UK) is likely an important predictor of mortality differences as well as socioeconomic status (SES). However, results can be conflicting for the influence of socioeconomic status on the health of ethnic minority persons, particularly in terms of the relationship between SES and mortality in migrants<sup>4,6</sup>.

This complexity and lack of consensus underlies the importance of conducting a systematic review that draws together all of the different pieces of research on mortality differences by ethnicity in the UK and synthesises them in a rigorous manner. A systematic review will help to provide clarity on health inequalities in terms of mortality in the UK and provide guidance for policies promoting health equity.

To the best of our knowledge, there has been no other systematic review of the relationship between ethnicity and all-cause mortality in the UK. To address this gap, we have developed a protocol for a systematic review that will identify, appraise and synthesise the evidence comparing all-cause mortality rates between major ethnic groups and the White majority population in the UK.

## Research question

1  
2  
3 The aim of this systematic review is to answer the following question: how do all-  
4 cause mortality rates differ between ethnic minority groups and the White majority  
5 population in the UK? The population (P) is defined as the population of the UK, the  
6 'risk factor' of interest (I term) is being a member of an ethnic minority population, the  
7 comparator (C term) is being a member of the White majority population and the  
8 outcome (O) is mortality.  
9

## 11 **Methods and analysis**

### 12 **Protocol design and registration**

13  
14  
15  
16 This protocol has been prepared according to the Preferred Reporting Items for  
17 Systematic reviews and Meta-analysis Protocols (PRISMA-P) statement and  
18 checklist (see online supplementary appendix 1)<sup>8</sup>. The protocol has also been  
19 registered in the PROSPERO international prospective register of systematic  
20 reviews (<http://www.crd.york.ac.uk/PROSPERO>) (number TBA). Any amendments to  
21 the protocol will be submitted to PROSPERO to establish a record of any changes  
22 and will be reported in the final published systematic review.  
23  
24  
25

### 26 **Patient and public involvement**

27  
28 No members of the public have been involved in the research design process. We  
29 will produce plain language summaries of our results for dissemination to members  
30 of the public.  
31  
32

### 33 **Ethics and dissemination**

34  
35 As no primary data will be collected, formal ethical approval is not required. The  
36 findings of this review will be disseminated through publication in peer reviewed  
37 journals and conference presentations.  
38  
39

## 40 **Eligibility criteria**

### 41 **Population**

42  
43 The population will be restricted to that of the UK and can include studies on  
44 samples in any country or region within the UK. Studies will be limited to those on  
45 population-based samples. Studies restricted to populations with a specific disease  
46 such as diabetes will be excluded as mortality rates in these population sub-groups  
47 would be higher and not able to be meaningfully combined with those based on the  
48 whole population.  
49  
50  
51  
52

### 53 **Ethnicity**

54  
55 Ethnicity can be defined by self-report or by proxy measures such as country of birth,  
56 country of birth of parents or ancestry. Table 1 shows the ethnic groups considered  
57 for inclusion in the study. These are based on ethnicity classifications used in the  
58 2011 censuses of England and Wales, Scotland and Northern Ireland<sup>9-11</sup>. Ethnic  
59  
60



1  
2  
3 groups selected for inclusion represent at least 0.5% of the population in any one of  
4 these three censuses. The exceptions are broad non-specific categories such as  
5 'other White' and 'other Western European' that were considered to be too  
6 heterogeneous to be meaningful and can have varying definitions depending on the  
7 sample. Where possible, we selected ethnic group classifications from the three UK  
8 censuses that were the most specific and narrowly defined rather than a larger  
9 composite group (for example, Indian and Pakistani British/Scottish as separate  
10 categories rather than the combined South Asian British/Scottish category).  
11 However, we selected broader groupings when more narrowly defined groupings  
12 were not available (e.g. Caribbean rather than Jamaican, African rather than  
13 Ghanaian). When broader groupings are used to define ethnic categories, we have  
14 provided in the second column of Table 1 details of what other more specific  
15 groupings will be included under the umbrella of this broader category. In contrast,  
16 when smaller more specific groupings are used, we provide in column two, details of  
17 what broader, less specific groupings would also be accepted in studies where only  
18 these broader groupings are used.  
19  
20  
21  
22  
23  
24

25 Studies that group multiple and extremely diverse ethnic groups together as one  
26 single category (such as all non-white ethnic minorities) will be excluded. Due to  
27 frequently observed differences in mortality between South Asians and East  
28 Asians<sup>4,7</sup> we will also not include data from studies using the composite group of  
29 Asian, where this group combines South Asians and East Asians as one category.  
30  
31  
32

### 33 **Comparators**

34 The comparator group is the ethnic majority population which could include any of  
35 the following groups in the UK depending on the location of the study:  
36  
37

- 38 • White British – the majority population for the UK
- 39 • White English/Welsh – the majority population for studies in England and  
40 Wales
- 41 • White Scottish – the majority population for studies in Scotland
- 42 • White Irish – the majority population for studies in Northern Ireland
- 43 • White – with all White or all White British ethnic groups included together
- 44 • Rest of the population – all other ethnic groups apart from the ethnic group(s)  
45 of interest in the study  
46  
47  
48  
49

### 50 **Outcome**

51 The outcome will be the all-cause mortality rate comparison by ethnicity which can  
52 be presented as a standardised mortality ratio (SMR), relative risk (RR) or hazard  
53 ratio (HR). Studies providing age adjusted beta coefficients will be included and the  
54 beta coefficients exponentiated. Studies that provide absolute measures of effect will  
55 also be included if sufficient information is provided to estimate relative measures.  
56 We will include outcomes adjusted for or stratified by a/ age and sex; b/ age, sex and  
57 SES; c/ all other confounders.  
58  
59  
60

## Study types

Due to the frequent under-representation of ethnic minority populations in cohort studies<sup>12</sup>, we will include all observational study types that meet our PICO inclusion criteria. This will include:

- Cross-sectional registry-based studies (unlinked numerator and denominator)
- Longitudinal registry-based studies (unlinked numerator and denominator)
- Cohort studies – including those involving data linkage

For peer review only

Table 1. Ethnic groups considered for inclusion in the systematic review

| Census category ethnic group                   | Composite/specific ethnic groups and synonyms to be accepted                                                                                 |
|------------------------------------------------|----------------------------------------------------------------------------------------------------------------------------------------------|
| British/White British                          | White                                                                                                                                        |
| English/White English                          | White                                                                                                                                        |
| Scottish/White Scottish                        | White                                                                                                                                        |
| Irish/White Irish                              | White                                                                                                                                        |
| Polish                                         | Eastern European                                                                                                                             |
| Indian/British Indian/Indian Scottish          | South Asian                                                                                                                                  |
| Pakistani/British Pakistani/Pakistani Scottish | South Asian                                                                                                                                  |
| Bangladeshi/British Bangladeshi                | South Asian/other South Asian                                                                                                                |
| Chinese/British Chinese/Chinese Scottish       | East Asian                                                                                                                                   |
| African/British African/African Scottish       | Black/African origin/Any ethnic group with an origin from any specific sub-Saharan African country (e.g. Ghanaian)                           |
| Caribbean                                      | Black/African Caribbean/West Indian/Any ethnic group with predominantly African ancestry from any specific Caribbean country (e.g. Jamaican) |
| Black Irish/Black Scottish/Black British       | Black/African origin                                                                                                                         |
| White and Black Caribbean                      | Mixed background                                                                                                                             |
| White and Asian                                | Mixed background                                                                                                                             |

## Search strategy

We will conduct searches of Medline (Ovid SP), Embase (Ovid SP), Scopus and ISI Web of Science (which includes ISI conference proceedings). We will conduct further searches of the grey literature through EThOS (the British Library e-theses online service) and ProQuest dissertations and theses: UK and Ireland. We will additionally search the NICE website and conduct searches on Google given that some material is likely to be published as government reports more readily available from the internet than in published journals. Searches will be carried out from inception to

1  
2  
3 August 2, 2019 with no language or other restrictions. Database searches will be  
4 repeated prior to publication to identify new articles published since the initial search.  
5 We will attempt to contact the authors of relevant studies where additional data may  
6 be available on mortality by ethnic subgroups. We will also perform forward and  
7 backward citation tracking of identified relevant articles. We will contact experts in  
8 the field for additional studies not located as part of the comprehensive search. We  
9 will also contact chief investigators of cohort studies in the UK where data on  
10 ethnicity and mortality are likely to have been collected but have not been published.  
11 The search strategy was developed by FFS in consultation with a medical librarian  
12 with expertise in conducting searches for systematic reviews. The Medline search  
13 strategy is provided in Supplementary Appendix 2.  
14  
15  
16  
17

## 18 **Data management**

19  
20  
21 Search results will be exported into Endnote X8.2 for screening purposes. An excel  
22 spreadsheet will be used to document the selection process and will document the  
23 total number of references located by each database, the total number of references  
24 identified after removal of duplicates, the total number of references identified via  
25 grey literature searches and the number of references selected at each stage of the  
26 screening process and reasons for exclusion.  
27  
28

## 29 **Selection process**

30  
31  
32 Two authors (FFS and NN) will independently screen titles and abstracts for possible  
33 selection into the study. Any article identified by at least one author will be included  
34 in the list of full text articles to review in the second stage of article selection. Two  
35 authors (FFS and NN) will then independently review full text versions of articles  
36 selected in the screening stage to confirm their eligibility for inclusion.  
37 Disagreements will be resolved by consensus or when necessary, consultation with  
38 a third reviewer (RSB). For studies that use overlapping datasets such as registry-  
39 based studies that have overlapping time periods, the study with data over the  
40 longest period will be included. If the time periods are of equivalent length, we will  
41 select the study that includes the most recent time period.  
42  
43  
44  
45

## 46 **Data extraction**

47  
48  
49 Data will be extracted by two authors (FFS and NN) independently. Data will be  
50 entered into a data extraction form that will be pilot tested by the two authors prior to  
51 commencing data extraction. Extracted information will include: study citation, study  
52 design, study location and setting, ethnic group(s) included and method of  
53 ascertainment of ethnicity, comparison group, participant characteristics (n, mean  
54 age, sex, SES) in each group, participation rates/losses/linkage rates in each group,  
55 method of outcome ascertainment, number of events in each group, the measure of  
56 effect for mortality comparison (SMR, HR, RR) and the confidence interval or  
57 standard error. We will extract the following effect measures if available: a/  
58  
59  
60

1  
2  
3 SMR/HR/RR adjusted for age and stratified by or adjusted for sex; b/ HR/RR  
4 adjusted for age and SES and stratified by or adjusted for sex; c/ HR/RR adjusted for  
5 other confounders. After completion of independent data extraction, the two authors  
6 will review both sets of extracted data together to check for errors and  
7 disagreements. Any disagreements will be resolved by consensus with the help of an  
8 additional author (EM) if necessary. Finalised data will be collated into an excel  
9 spreadsheet. For studies with missing data or with some outcome data not  
10 disaggregated by sex or particular ethnic groups, contact will be made with original  
11 authors requesting the raw data if available. Contact will also be made with  
12 investigators of major cohort studies in the UK where data on ethnicity and mortality  
13 have likely been collected but not reported in publications.  
14  
15  
16  
17

## 18 **Risk of bias assessment of individual studies**

20  
21 Study quality will be appraised independently by two authors (FFS and EM).  
22 Disagreements will be resolved by consensus or when necessary, consultation with  
23 a third reviewer (RSB). The quality of included studies will be appraised using a  
24 modified version of the Newcastle-Ottawa scale<sup>13</sup> (Supplementary Appendix 3). The  
25 risk of bias table will be grouped according to study type. For cross-sectional studies,  
26 only the first three questions under selection, the single question under comparability  
27 and the first question under outcome will be used. Some further specific details on  
28 the use of the Newcastle-Ottawa scale in this systematic review are as follows:  
29  
30  
31

32 The Newcastle-Ottawa Scale will be scored using a similar approach to the  
33 Cochrane risk of bias tool, where a judgement will be made about the risk of bias  
34 being high, low or unclear. A low risk of bias will be equivalent to receiving stars for  
35 particular items as recommended in the manual for the Newcastle-Ottawa Scale.  
36 However, this modified approach will allow us to distinguish between studies that  
37 likely have a high risk of bias due to serious methodological flaws and those with  
38 unclear risk of bias due to inadequate reporting or lack of information about the  
39 likelihood of particular biases such as salmon bias<sup>14</sup> in a particular ethnic group.  
40  
41  
42  
43

44 Other differences in the use of this scale will be as follows: in terms of comparability,  
45 we will only assess if the study adjusts for/stratifies by age and sex. In terms of  
46 ascertainment of exposure, the ideal method of exposure assessment will be self-  
47 reported ethnicity which will be given a low risk of bias assessment. Proxy measures  
48 for ethnicity such as country of birth will also receive a low risk of bias rating if there  
49 is good evidence that this is an accurate measure of ethnicity in the specific  
50 instance. As the accuracy of country of birth as a proxy measure varies by ethnic  
51 group<sup>15</sup>, in studies that include a number of different ethnic groups a judgement of  
52 risk of bias will be made for each ethnic group included in the study and provided as  
53 a supplementary file, but only a summary judgement for the study overall will be  
54 displayed in the main risk of bias table. The summary judgement will be based on  
55 the average risk of bias for exposure ascertainment across all included ethnic  
56 groups.  
57  
58  
59  
60

1  
2  
3 We will add an additional domain of other bias to incorporate the problem of  
4 numerator/denominator mismatch that can occur in unlinked registry-based studies.  
5 The likelihood of this bias being present will be judged according to publications  
6 reporting the likelihood of this bias in UK data for specific ethnic groups in addition to  
7 the information provided in the included studies. For studies using data linkage,  
8 reported linkage rates will be used as part of the judgement of numerator-  
9 denominator bias. Similar to exposure ascertainment, numerator-denominator bias  
10 may differ between ethnic groups, and when this is likely a risk of bias judgement will  
11 be made for each ethnic group separately, but only a summary judgement for the  
12 study overall will be displayed in the main table.  
13  
14  
15  
16

## 17 **Quality of evidence for individual ethnic groups**

18  
19 We will examine the quality of the body of evidence for mortality differences for each  
20 ethnic group using GRADE criteria<sup>16</sup>. This will include consideration of risk of bias  
21 assessment (with consideration given to the specific risk of bias assessment for  
22 individual ethnic groups in terms of exposure ascertainment, linkage rates etc),  
23 inconsistency of results, indirectness of evidence, imprecision and publication bias.  
24  
25  
26

## 27 **Data synthesis**

28  
29 Data synthesis will be carried out by author SKS using a random effects model<sup>17</sup>.  
30 Analyses will be conducted in STATA version 16.0 (StataCorp, College Station, TX).  
31 We will only conduct quantitative synthesis if we locate at least two studies for a  
32 particular ethnic group and if there is sufficient homogeneity to enable meaningful  
33 synthesis as detailed below in the section on subgroup analysis and investigation of  
34 heterogeneity. In the absence of a quantitative synthesis we will provide a narrative  
35 synthesis of results by ethnic group. Quantitative synthesis of age adjusted results  
36 will be stratified by sex and ethnic group. We will conduct additional quantitative  
37 synthesis of results adjusted for age and SES also stratified by sex and ethnic group  
38 if available data permits. If data extracted are adjusted for rather than stratified by  
39 sex, we will summarise this additional data narratively and provide the results in the  
40 appendices. If extracted effect measures are adjusted for other potential  
41 confounders in addition to age, sex and SES, such as health behaviours and  
42 comorbidities, we will summarise this information narratively and provide the data in  
43 the appendices.  
44  
45  
46  
47  
48  
49

50 Given the likely diversity in measures of effects used between unlinked registry  
51 studies and cohort studies we will treat standardised mortality ratios, hazard ratios  
52 and relative risks as equivalent measures of effect. As event rates are likely to be  
53 low in population-based samples including in the non-exposed group, the hazard  
54 ratio and relative risk should be equivalent<sup>18</sup>. In addition, as the proportion of most  
55 ethnic minority populations included in the analysis will range between 0.5-2.5%, the  
56 standardised mortality ratio is less likely to be a biased representation of the relative  
57 risk as the exposure rate (ethnicity) is low<sup>19</sup>. However, given that the standardised  
58  
59  
60



1  
2  
3 mortality ratio can be biased when both age-specific mortality ratios and population  
4 age distribution differs between ethnic groups<sup>20</sup>, we will include consideration of  
5 difference in effect measures in our assessment of heterogeneity as discussed  
6 below. We will screen for publication bias using a funnel plot and Begg's test<sup>21</sup> if at  
7 least 10 studies are located for a particular quantitative synthesis. We will also  
8 investigate publication bias by sub-group analysis comparing results of published  
9 and unpublished data if sufficient data are available.  
10  
11  
12

13 Where data sources for a single ethnic group include disparate time periods, we will  
14 arrange studies by date and then conduct a random-effects cumulative meta-  
15 analysis<sup>22</sup> to examine how comparative mortality estimates evolve over time. If data  
16 is available on both country of birth and self-reported ethnicity from included studies,  
17 we will conduct subgroup analyses within ethnic groups by country of birth (UK- vs  
18 overseas-born). The need for this subgroup analysis is based on the need to account  
19 for the healthy migrant effect as a potential underlying cause of observed differences  
20 in mortality rates and the importance of understanding if there are differences in  
21 mortality between overseas-born and UK-born ethnic minority group members. We  
22 also plan subgroup analyses based on different comparison populations (e.g. White  
23 British, White Scottish, White Irish). This is due to frequently poorer observed health  
24 in White Scottish and White Irish populations compared to White British populations<sup>4</sup>.  
25 In addition, there is some evidence that the health of non-White minority groups can  
26 differ between countries in the UK. If sufficient high-quality cohort studies are  
27 located, we will also conduct sensitivity analyses restricted to these high-quality  
28 studies with results from cross-sectional studies and unlinked registry studies  
29 removed. If high heterogeneity is observed, we will investigate whether this is  
30 reduced by conducting the prespecified subgroup and sensitivity analyses listed  
31 below.  
32  
33  
34  
35  
36  
37  
38

### 39 **Investigation of heterogeneity**

40  
41 We will assess for the presence of heterogeneity using Cochran's Q and the I<sup>2</sup>  
42 Statistic<sup>23</sup>. If we observe an I<sup>2</sup> value of 50% or more, we will explore possible  
43 explanations for the observed heterogeneity in subgroup and sensitivity analyses as  
44 detailed below. If sufficient studies are available, we will consider the use of meta-  
45 regression in our exploration of causes of heterogeneity. The first two subgroup  
46 analyses listed below will be conducted regardless of the presence or absence of  
47 statistical heterogeneity.  
48  
49  
50

### 51 **Subgroup analyses**

- 52 1. UK-born versus overseas-born within each ethnic group to examine the  
53 contribution of early life environment to observed differences in mortality by  
54 ethnicity.
- 55 2. Published versus unpublished results within each ethnic group to examine the  
56 presence of publication bias.  
57  
58  
59  
60

## Subgroup analyses to explore heterogeneity

1. Method of ethnicity ascertainment between studies – country of birth vs self-reported ethnicity vs other methods.
2. Definition/included groups in one major ethnic group – e.g. South Asian vs subgroups of Indian, Pakistani, Bangladeshi.
3. Comparison population/geographic location – e.g. White majority population in England and Wales vs White Scottish population in Scotland.

## Sensitivity analyses

1. Study design – non-cohort studies removed.
2. Risk of bias – within cohort studies only, studies with high risk of bias will be removed.
3. Measure of effect – hazard ratio vs relative risk or standardised mortality ratio.

If any of the above are identified as a plausible explanation of the observed heterogeneity, we will conduct a quantitative synthesis at the subgroup level if sufficient studies are available. If insufficient studies are available, we will summarise the results of studies narratively.

## Ethics and dissemination

To our knowledge, the proposed systematic review will be the first to systematically collect and synthesise evidence on mortality differences between the major ethnic groups in the UK. The results of the review will provide important evidence about health inequalities and provide important guidance for policies promoting health equity. It is also likely that the review will identify important gaps in the knowledge base such as a lack of research in particular ethnic groups or insufficient evidence in terms of differences in mortality between UK-born and overseas-born members of particular ethnic minority groups.

On completion of the review, we will implement a robust knowledge translation strategy that will include publication in peer-reviewed journals with selection of an open access format where possible, presentation of results at relevant conferences, and production of plain language summaries for dissemination of results to members of the public.

## References

1. Office for National Statistics. Ethnicity and National Identity in England and Wales: 2011 2012 [Available from: <https://www.ons.gov.uk/peoplepopulationandcommunity/culturalidentity/ethnicity/articles/ethnicityandnationalidentityinenglandandwales/2012-12-11>].



- 1
  - 2
  - 3
  - 4
  - 5
  - 6
  - 7
  - 8
  - 9
  - 10
  - 11
  - 12
  - 13
  - 14
  - 15
  - 16
  - 17
  - 18
  - 19
  - 20
  - 21
  - 22
  - 23
  - 24
  - 25
  - 26
  - 27
  - 28
  - 29
  - 30
  - 31
  - 32
  - 33
  - 34
  - 35
  - 36
  - 37
  - 38
  - 39
  - 40
  - 41
  - 42
  - 43
  - 44
  - 45
  - 46
  - 47
  - 48
  - 49
  - 50
  - 51
  - 52
  - 53
  - 54
  - 55
  - 56
  - 57
  - 58
  - 59
  - 60
2. Siva N. Race relations in the UK's National Health Service. *Lancet*. 2009;373(9679):1935-6.
  3. Sealy-Jefferson S, Vickers J, Elam A, Wilson MR. Racial and Ethnic Health Disparities and the Affordable Care Act: a Status Update. *J Racial Ethn Health*. 2015;2(4):583-8.
  4. Bhopal RS, Gruer L, Cezard G et al. Mortality, ethnicity, and country of birth on a national scale, 2001-2013: A retrospective cohort (Scottish Health and Ethnicity Linkage Study). *PLOS Medicine*. 2018;15(3):e1002515. <https://doi.org/10.1371/journal.pmed.1002515>
  5. Marmot MG, Adelstein AM, Bulusu L. Lessons from the study of immigrant mortality. *Lancet* 1984; 1:1455-7.
  6. Stanaway FF, Blyth FM, Naganathan V et al. Mortality paradox of older Italian-born men in Australia: the Concord Health and Ageing in Men Project. *J Immigr Minor Health*. 2019. doi:10.1007/s10903-019-00874-2
  7. Scott A, Timaeus IM. Mortality differentials 1991-2005 by self-reported ethnicity: findings from the ONS Longitudinal Study. *J Epidemiol Community Health* 2013;67:743-750. doi:10.1136/jech-2012-202265
  8. Shamseer L, Moher D, Clarke M et al. Preferred reporting items for systematic review and meta-analysis protocols (PRISMA-P) 2015: elaboration and explanation. *BMJ* 2015;349:g7647. doi:10.1136/bmj.g7647
  9. Office for National Statistics. 2011 Census: Ethnic group (write-in responses), local authorities in England and Wales. <https://www.ons.gov.uk/census/2011census> [Accessed 06 June 2019]
  10. National Records of Scotland. Scotland's Census 2011. Table K2310SC Ethnic group. <https://www.scotlandscensus.gov.uk/census-results> [Accessed 06 June 2019]
  11. Census Office for Northern Ireland. 2011 Census in Northern Ireland. Ethnic Group full detail: QS201NI. <https://www.nisra.gov.uk/statistics/2011-census/results> [Accessed 06 June 2019]
  12. Ranganathan M, Bhopal R. Exclusion and inclusion of Nonwhite ethnic minority groups in 72 North American and European cardiovascular cohort studies. *PLOS Medicine* 2006. <https://doi.org/10.1371/journal.pmed.0030044>
  13. Wells GA, Shea B, O'Connell D, Peterson J, Welch V, Losos M, et al. The Newcastle-Ottawa Scale (NOS) for assessing the quality of nonrandomized studies in meta-analyses. Available from: URL: [http://www.ohri.ca/programs/clinical\\_epidemiology/oxford.htm](http://www.ohri.ca/programs/clinical_epidemiology/oxford.htm) [Accessed 05 August 2019]
  14. Razum O, Zeeb H, Rohrmann S. The 'healthy migrant effect' – not merely a fallacy of inaccurate denominator figures. *Int J Epidemiol* 2000; 29:191-2
  15. Bhopal RS. Migration, ethnicity, race, and health in multicultural societies. Second edition. Oxford: Oxford University Press; 2014:p79.
  16. Guyatt GH, Oxman AD, Vist GE et al. GRADE: an emerging consensus on rating quality of evidence and strength of recommendations. *BMJ*. 2008;336(7650):924-6.
  17. Borenstein M, Hedges LV, Higgins JP, Rothstein HR. A basic introduction to fixed-effect and random-effects models for meta-analysis. *Res Synth Methods*. 2008;1(2):97-111. <https://doi.org/10.1002/jrsm.12>
  18. Perneger TV. Estimating the relative hazard by the ratio of logarithms of event-free proportions. *Contemporary Clinical Trials*. 2008;29:762-766

19. Jones ME, Swerdlow AJ. Bias in the standardized mortality ratio when using general population rates to estimate expected number of deaths. *Am J Epidemiol* 1998;148:1012-7
20. Tsai SP, Wen CP. A review of methodological issues of the standardized mortality ratio (SMR) in occupational cohort studies. *Int J Epidemiol* 1986;15:8-21
21. Egger M, Davey Smith G, Schneider M, Minder C. Bias in meta-analysis detected by a simple, graphical test. *BMJ*. 1997;315:629-34
22. Lau J, Antman EM, Jimenez-Silva J, et al. Cumulative meta-analysis of therapeutic trials for myocardial infarction. *NEJM* 1992;327:248-254.
23. Higgins JPT, Altman DG, Sterne JAC. Chapter 9: Analysing data and undertaking meta-analysis. In: Higgins JP, Green S, (editors). *Cochrane Handbook for Systematic Reviews of Interventions* Version 5.1.0 (updated March 2011). The Cochrane Collaboration, 2011.

### Authors' contributions

RB and FFS conceived the idea for the study. FFS, NN, SKS, EM and RB planned and designed the study protocol in terms of ethnic groups to be included, literature search strategy, risk of bias assessment and data synthesis. FFS wrote the first draft with all authors contributing critical insights and comments of specific elements (NN search strategy and data management, EM risk of bias assessment, SKS statistical analysis and data synthesis, and RB categorisation of ethnicity and need for comparison between UK-born and foreign-born populations). All authors have approved and contributed to the final version of the protocol.

### Funding statement

Open access fees were covered by financial support from the Sydney School of Public Health Academic Support Scheme. The School of Public Health had no role in developing the protocol.

### Competing interests

None of the authors declare any competing interests

### Word count 3507

### Supplementary files

Appendix 1: PRISMA-P checklist

Appendix 2: Example search strategy in Ovid MEDLINE

Appendix 3: Newcastle-Ottawa scale

## PRISMA- P 2015 Checklist

This checklist has been adapted for use with protocol submissions to *Systematic Reviews* from Table 3 in Moher D et al: Preferred reporting items for systematic review and meta-analysis protocols (PRISMA-P) 2015 statement. *Systematic Reviews* 2015 4:1

| Section/topic                     | #  | Checklist item                                                                                                                                                                                  | Information reported                |                          | Page number(s)                                                                |
|-----------------------------------|----|-------------------------------------------------------------------------------------------------------------------------------------------------------------------------------------------------|-------------------------------------|--------------------------|-------------------------------------------------------------------------------|
|                                   |    |                                                                                                                                                                                                 | Yes                                 | No                       |                                                                               |
| <b>ADMINISTRATIVE INFORMATION</b> |    |                                                                                                                                                                                                 |                                     |                          |                                                                               |
| <b>Title</b>                      |    |                                                                                                                                                                                                 |                                     |                          |                                                                               |
| Identification                    | 1a | Identify the report as a protocol of a systematic review                                                                                                                                        | <input checked="" type="checkbox"/> | <input type="checkbox"/> | 1                                                                             |
| Update                            | 1b | If the protocol is for an update of a previous systematic review, identify as such                                                                                                              | <input type="checkbox"/>            | <input type="checkbox"/> | n/a                                                                           |
| <b>Registration</b>               | 2  | If registered, provide the name of the registry (e.g., PROSPERO) and registration number in the Abstract                                                                                        | <input checked="" type="checkbox"/> | <input type="checkbox"/> | 2 (awaiting confirmation of registration from Prospero, submitted 06/08/2019) |
| <b>Authors</b>                    |    |                                                                                                                                                                                                 |                                     |                          |                                                                               |
| Contact                           | 3a | Provide name, institutional affiliation, and e-mail address of all protocol authors; provide physical mailing address of corresponding author                                                   | <input checked="" type="checkbox"/> | <input type="checkbox"/> | 1                                                                             |
| Contributions                     | 3b | Describe contributions of protocol authors and identify the guarantor of the review                                                                                                             | <input checked="" type="checkbox"/> | <input type="checkbox"/> | 14                                                                            |
| <b>Amendments</b>                 | 4  | If the protocol represents an amendment of a previously completed or published protocol, identify as such and list changes; otherwise, state plan for documenting important protocol amendments | <input checked="" type="checkbox"/> | <input type="checkbox"/> | 5                                                                             |
| <b>Support</b>                    |    |                                                                                                                                                                                                 |                                     |                          |                                                                               |
| Sources                           | 5a | Indicate sources of financial or other support for the review                                                                                                                                   | <input checked="" type="checkbox"/> | <input type="checkbox"/> | 14                                                                            |
| Sponsor                           | 5b | Provide name for the review funder and/or sponsor                                                                                                                                               | <input checked="" type="checkbox"/> | <input type="checkbox"/> | 14                                                                            |
| Role of sponsor/funder            | 5c | Describe roles of funder(s), sponsor(s), and/or institution(s), if any, in developing the protocol                                                                                              | <input checked="" type="checkbox"/> | <input type="checkbox"/> | 14                                                                            |
| <b>INTRODUCTION</b>               |    |                                                                                                                                                                                                 |                                     |                          |                                                                               |

| Section/topic                             | #   | Checklist item                                                                                                                                                                                                            | Information reported                |                          | Page number(s)           |
|-------------------------------------------|-----|---------------------------------------------------------------------------------------------------------------------------------------------------------------------------------------------------------------------------|-------------------------------------|--------------------------|--------------------------|
|                                           |     |                                                                                                                                                                                                                           | Yes                                 | No                       |                          |
| <b>Rationale</b>                          | 6   | Describe the rationale for the review in the context of what is already known                                                                                                                                             | <input checked="" type="checkbox"/> | <input type="checkbox"/> | 4                        |
| <b>Objectives</b>                         | 7   | Provide an explicit statement of the question(s) the review will address with reference to participants, interventions, comparators, and outcomes (PICO)                                                                  | <input checked="" type="checkbox"/> | <input type="checkbox"/> | 4                        |
| <b>METHODS</b>                            |     |                                                                                                                                                                                                                           |                                     |                          |                          |
| <b>Eligibility criteria</b>               | 8   | Specify the study characteristics (e.g., PICO, study design, setting, time frame) and report characteristics (e.g., years considered, language, publication status) to be used as criteria for eligibility for the review | <input checked="" type="checkbox"/> | <input type="checkbox"/> | 5-7                      |
| <b>Information sources</b>                | 9   | Describe all intended information sources (e.g., electronic databases, contact with study authors, trial registers, or other grey literature sources) with planned dates of coverage                                      | <input checked="" type="checkbox"/> | <input type="checkbox"/> | 7,8                      |
| <b>Search strategy</b>                    | 10  | Present draft of search strategy to be used for at least one electronic database, including planned limits, such that it could be repeated                                                                                | <input checked="" type="checkbox"/> | <input type="checkbox"/> | Supplementary Appendix 2 |
| <b>STUDY RECORDS</b>                      |     |                                                                                                                                                                                                                           |                                     |                          |                          |
| Data management                           | 11a | Describe the mechanism(s) that will be used to manage records and data throughout the review                                                                                                                              | <input checked="" type="checkbox"/> | <input type="checkbox"/> | 8, 9                     |
| Selection process                         | 11b | State the process that will be used for selecting studies (e.g., two independent reviewers) through each phase of the review (i.e., screening, eligibility, and inclusion in meta-analysis)                               | <input checked="" type="checkbox"/> | <input type="checkbox"/> | 8                        |
| Data collection process                   | 11c | Describe planned method of extracting data from reports (e.g., piloting forms, done independently, in duplicate), any processes for obtaining and confirming data from investigators                                      | <input checked="" type="checkbox"/> | <input type="checkbox"/> | 8,9                      |
| <b>Data items</b>                         | 12  | List and define all variables for which data will be sought (e.g., PICO items, funding sources), any pre-planned data assumptions and simplifications                                                                     | <input checked="" type="checkbox"/> | <input type="checkbox"/> | 8, 9                     |
| <b>Outcomes and prioritization</b>        | 13  | List and define all outcomes for which data will be sought, including prioritization of main and additional outcomes, with rationale                                                                                      | <input checked="" type="checkbox"/> | <input type="checkbox"/> | 8, 9                     |
| <b>Risk of bias in individual studies</b> | 14  | Describe anticipated methods for assessing risk of bias of individual studies, including whether this will be done at the outcome or study level, or both; state how this information will be used in data synthesis      | <input checked="" type="checkbox"/> | <input type="checkbox"/> | 9-11                     |
| <b>DATA</b>                               |     |                                                                                                                                                                                                                           |                                     |                          |                          |
| <b>Synthesis</b>                          | 15a | Describe criteria under which study data will be quantitatively synthesized                                                                                                                                               | <input checked="" type="checkbox"/> | <input type="checkbox"/> | 10-12                    |

| Section/topic                            | #   | Checklist item                                                                                                                                                                                                                              | Information reported                |                          | Page number(s) |
|------------------------------------------|-----|---------------------------------------------------------------------------------------------------------------------------------------------------------------------------------------------------------------------------------------------|-------------------------------------|--------------------------|----------------|
|                                          |     |                                                                                                                                                                                                                                             | Yes                                 | No                       |                |
|                                          | 15b | If data are appropriate for quantitative synthesis, describe planned summary measures, methods of handling data, and methods of combining data from studies, including any planned exploration of consistency (e.g., $I^2$ , Kendall's tau) | <input checked="" type="checkbox"/> | <input type="checkbox"/> | 10-12          |
|                                          | 15c | Describe any proposed additional analyses (e.g., sensitivity or subgroup analyses, meta-regression)                                                                                                                                         | <input checked="" type="checkbox"/> | <input type="checkbox"/> | 11,12          |
|                                          | 15d | If quantitative synthesis is not appropriate, describe the type of summary planned                                                                                                                                                          | <input checked="" type="checkbox"/> | <input type="checkbox"/> | 11,12          |
| <b>Meta-bias(es)</b>                     | 16  | Specify any planned assessment of meta-bias(es) (e.g., publication bias across studies, selective reporting within studies)                                                                                                                 | <input checked="" type="checkbox"/> | <input type="checkbox"/> | 11,12          |
| <b>Confidence in cumulative evidence</b> | 17  | Describe how the strength of the body of evidence will be assessed (e.g., GRADE)                                                                                                                                                            | <input checked="" type="checkbox"/> | <input type="checkbox"/> | 10             |

## Appendix 2

### Medline (Ovid SP) search

| #  | Search Terms                    |
|----|---------------------------------|
| 1  | exp United Kingdom/             |
| 2  | england*.mp.                    |
| 3  | scotland*.mp.                   |
| 4  | northern ireland.mp.            |
| 5  | wales.mp.                       |
| 6  | united kingdom.mp.              |
| 7  | britain.mp.                     |
| 8  | 1 or 2 or 3 or 4 or 5 or 6 or 7 |
| 9  | exp Ethnic Groups/              |
| 10 | exp Minority Groups/            |
| 11 | exp "Transients and Migrants"/  |
| 12 | exp "Emigrants and Immigrants"/ |
| 13 | polish.mp.                      |
| 14 | indian.mp.                      |
| 15 | pakistan*.mp.                   |

|    |                                                                                 |
|----|---------------------------------------------------------------------------------|
| 16 | bangladesh*.mp.                                                                 |
| 17 | chinese.mp.                                                                     |
| 18 | african.mp.                                                                     |
| 19 | caribbean.mp.                                                                   |
| 20 | black.mp.                                                                       |
| 21 | mixed.mp.                                                                       |
| 22 | ethnic*.mp.                                                                     |
| 23 | 9 or 10 or 11 or 12 or 13 or 14 or 15 or 16 or 17 or 18 or 19 or 20 or 21 or 22 |
| 24 | exp Mortality/                                                                  |
| 25 | exp Death/                                                                      |
| 26 | mortal*.mp.                                                                     |
| 27 | 24 or 25 or 26                                                                  |
| 28 | 8 and 23 and 27                                                                 |

## Appendix 3

### Newcastle-Ottawa quality assessment scale with modifications and assessment criteria described

| Question                                                                           | Risk of bias assessment | Criteria for risk of bias assessment                                                                                                                                   |
|------------------------------------------------------------------------------------|-------------------------|------------------------------------------------------------------------------------------------------------------------------------------------------------------------|
| <b>Selection</b>                                                                   |                         |                                                                                                                                                                        |
| <b>1. Representativeness of the exposed sample</b>                                 | Low                     | Representative of members of the respective ethnic minority group (census-based whole population sample or cross-sectional/cohort study with high participation rates) |
|                                                                                    | High                    | Selected group such as nurses, volunteers                                                                                                                              |
|                                                                                    | Unclear                 | No description of derivation of exposed sample                                                                                                                         |
| <b>2. Selection of non-exposed sample</b>                                          | Low                     | Drawn from the same community as the exposed sample/similar participation rates as the exposed sample                                                                  |
|                                                                                    | High                    | Drawn from a different source to the exposed sample                                                                                                                    |
|                                                                                    | Unclear                 | No description of derivation of exposed sample                                                                                                                         |
| <b>3. Ascertainment of exposure</b>                                                | Low                     | Self-reported ethnicity. Proxy measures of ethnicity (country of birth, country of birth of parents, ancestry) if evidence they are accurate measures of ethnicity     |
|                                                                                    | High                    | Proxy measures of ethnicity that are not accurate measures of self-reported ethnicity                                                                                  |
|                                                                                    | Unclear                 | Method of exposure ascertainment not described OR proxy measure used and no data available on accuracy as a measure of self-reported ethnicity                         |
| <b>4. Demonstration that outcome of interest was no present at start of study*</b> | Low                     | Outcome not present at start of study                                                                                                                                  |
|                                                                                    | High                    | Outcome present at start of study                                                                                                                                      |
|                                                                                    | Unclear                 | Unable to determine if outcome present at start of study                                                                                                               |
| <b>Comparability</b>                                                               |                         |                                                                                                                                                                        |
| <b>1. Comparability of cohorts on the basis of the design or analysis</b>          | Low                     | Effect measures are adjusted/stratified by age and sex                                                                                                                 |
|                                                                                    | High                    | Effect measures are not adjusted/stratified by age and sex                                                                                                             |
|                                                                                    | Unclear                 | Unclear if effect measures have been adjusted for age/sex                                                                                                              |
| <b>Outcome</b>                                                                     |                         |                                                                                                                                                                        |
| <b>1. Assessment of outcome</b>                                                    | Low                     | Independent blind assessment of outcome or record linkage                                                                                                              |
|                                                                                    | High                    | Self-report                                                                                                                                                            |
|                                                                                    | Unclear                 | Method of outcome assessment not described                                                                                                                             |



|                                                            |         |                                                                                                                                                                                                                         |
|------------------------------------------------------------|---------|-------------------------------------------------------------------------------------------------------------------------------------------------------------------------------------------------------------------------|
| <b>2. Was follow-up long enough for outcomes to occur*</b> | Low     | At least 24 months of follow-up or shorter period with high event rates (older population)                                                                                                                              |
|                                                            | High    | Less than 24 months of follow-up and low event rates                                                                                                                                                                    |
|                                                            | Unclear | Length of follow up not reported                                                                                                                                                                                        |
| <b>3. Adequacy of follow up*</b>                           | Low     | No or small loss to follow up, losses even between comparison groups                                                                                                                                                    |
|                                                            | High    | Large loss to follow up that has potential to change estimate of effect (determined by worst-case best-case analysis) OR losses uneven between comparison groups                                                        |
|                                                            | Unclear | Losses not reported                                                                                                                                                                                                     |
| <b>Other bias</b>                                          |         |                                                                                                                                                                                                                         |
| <b>1. Numerator-denominator bias/linkage rates</b>         | Low     | Low proportion of migrants in ethnic group <20% OR evidence that missed overseas deaths are low OR high rates of data linkage that are equal between comparison groups                                                  |
|                                                            | High    | High proportion of migrants in ethnic group AND evidence that likelihood of missed overseas deaths is high and likely to change reported estimates, OR high rates of unlinked participants that differs by ethnic group |
|                                                            | Unclear | No information on proportion of migrants in ethnic group, likelihood of missed overseas deaths, or rates of data linkage                                                                                                |

\*Not assessed in cross-sectional studies
