# Supplementary material for: Mortality of ethnic minority groups in the UK: a systematic review protocol
Source: PubMed Central journal article supplement — BMJ Open. 2020 Jun 28;10(6):e034903. doi: 10.1136/bmjopen-2019-034903 (PMC7322291; doi:10.1136/bmjopen-2019-034903), 2020-06-28
Supplement: bmjopen-2019-034903supp002.pdf [file bmjopen-2019-034903supp002.pdf]

## Appendix 2

### Medline (Ovid SP) search

| #  | Search Terms                    |
|----|---------------------------------|
| 1  | exp United Kingdom/             |
| 2  | england*.mp.                    |
| 3  | scotland*.mp.                   |
| 4  | northern ireland.mp.            |
| 5  | wales.mp.                       |
| 6  | united kingdom.mp.              |
| 7  | britain.mp.                     |
| 8  | 1 or 2 or 3 or 4 or 5 or 6 or 7 |
| 9  | exp Ethnic Groups/              |
| 10 | exp Minority Groups/            |
| 11 | exp "Transients and Migrants"/  |
| 12 | exp "Emigrants and Immigrants"/ |
| 13 | polish.mp.                      |
| 14 | indian.mp.                      |
| 15 | pakistan*.mp.                   |

|    |                                                                                 |
|----|---------------------------------------------------------------------------------|
| 16 | bangladesh*.mp.                                                                 |
| 17 | chinese.mp.                                                                     |
| 18 | african.mp.                                                                     |
| 19 | caribbean.mp.                                                                   |
| 20 | black.mp.                                                                       |
| 21 | mixed.mp.                                                                       |
| 22 | ethnic*.mp.                                                                     |
| 23 | 9 or 10 or 11 or 12 or 13 or 14 or 15 or 16 or 17 or 18 or 19 or 20 or 21 or 22 |
| 24 | exp Mortality/                                                                  |
| 25 | exp Death/                                                                      |
| 26 | mortal*.mp.                                                                     |
| 27 | 24 or 25 or 26                                                                  |
| 28 | 8 and 23 and 27                                                                 |
