# Supplementary material for: Mortality of ethnic minority groups in the UK: a systematic review protocol
Source: PubMed Central journal article supplement — BMJ Open. 2020 Jun 28;10(6):e034903. doi: 10.1136/bmjopen-2019-034903 (PMC7322291; doi:10.1136/bmjopen-2019-034903), 2020-06-28
Supplement: bmjopen-2019-034903supp003.pdf [file bmjopen-2019-034903supp003.pdf]

## Appendix 3

### Newcastle-Ottawa quality assessment scale with modifications and assessment criteria described

| Question                                                                           | Risk of bias assessment | Criteria for risk of bias assessment                                                                                                                                   |
|------------------------------------------------------------------------------------|-------------------------|------------------------------------------------------------------------------------------------------------------------------------------------------------------------|
| <b>Selection</b>                                                                   |                         |                                                                                                                                                                        |
| <b>1. Representativeness of the exposed sample</b>                                 | Low                     | Representative of members of the respective ethnic minority group (census-based whole population sample or cross-sectional/cohort study with high participation rates) |
|                                                                                    | High                    | Selected group such as nurses, volunteers                                                                                                                              |
|                                                                                    | Unclear                 | No description of derivation of exposed sample                                                                                                                         |
| <b>2. Selection of non-exposed sample</b>                                          | Low                     | Drawn from the same community as the exposed sample/similar participation rates as the exposed sample                                                                  |
|                                                                                    | High                    | Drawn from a different source to the exposed sample                                                                                                                    |
|                                                                                    | Unclear                 | No description of derivation of exposed sample                                                                                                                         |
| <b>3. Ascertainment of exposure</b>                                                | Low                     | Self-reported ethnicity. Proxy measures of ethnicity (country of birth, country of birth of parents, ancestry) if evidence they are accurate measures of ethnicity     |
|                                                                                    | High                    | Proxy measures of ethnicity that are not accurate measures of self-reported ethnicity                                                                                  |
|                                                                                    | Unclear                 | Method of exposure ascertainment not described OR proxy measure used and no data available on accuracy as a measure of self-reported ethnicity                         |
| <b>4. Demonstration that outcome of interest was no present at start of study*</b> | Low                     | Outcome not present at start of study                                                                                                                                  |
|                                                                                    | High                    | Outcome present at start of study                                                                                                                                      |
|                                                                                    | Unclear                 | Unable to determine if outcome present at start of study                                                                                                               |
| <b>Comparability</b>                                                               |                         |                                                                                                                                                                        |
| <b>1. Comparability of cohorts on the basis of the design or analysis</b>          | Low                     | Effect measures are adjusted/stratified by age and sex                                                                                                                 |
|                                                                                    | High                    | Effect measures are not adjusted/stratified by age and sex                                                                                                             |
|                                                                                    | Unclear                 | Unclear if effect measures have been adjusted for age/sex                                                                                                              |
| <b>Outcome</b>                                                                     |                         |                                                                                                                                                                        |
| <b>1. Assessment of outcome</b>                                                    | Low                     | Independent blind assessment of outcome or record linkage                                                                                                              |
|                                                                                    | High                    | Self-report                                                                                                                                                            |
|                                                                                    | Unclear                 | Method of outcome assessment not described                                                                                                                             |

|                                                            |         |                                                                                                                                                                                                                         |
|------------------------------------------------------------|---------|-------------------------------------------------------------------------------------------------------------------------------------------------------------------------------------------------------------------------|
| <b>2. Was follow-up long enough for outcomes to occur*</b> | Low     | At least 24 months of follow-up or shorter period with high event rates (older population)                                                                                                                              |
|                                                            | High    | Less than 24 months of follow-up and low event rates                                                                                                                                                                    |
|                                                            | Unclear | Length of follow up not reported                                                                                                                                                                                        |
| <b>3. Adequacy of follow up*</b>                           | Low     | No or small loss to follow up, losses even between comparison groups                                                                                                                                                    |
|                                                            | High    | Large loss to follow up that has potential to change estimate of effect (determined by worst-case best-case analysis) OR losses uneven between comparison groups                                                        |
|                                                            | Unclear | Losses not reported                                                                                                                                                                                                     |
| <b>Other bias</b>                                          |         |                                                                                                                                                                                                                         |
| <b>1. Numerator-denominator bias/linkage rates</b>         | Low     | Low proportion of migrants in ethnic group <20% OR evidence that missed overseas deaths are low OR high rates of data linkage that are equal between comparison groups                                                  |
|                                                            | High    | High proportion of migrants in ethnic group AND evidence that likelihood of missed overseas deaths is high and likely to change reported estimates, OR high rates of unlinked participants that differs by ethnic group |
|                                                            | Unclear | No information on proportion of migrants in ethnic group, likelihood of missed overseas deaths, or rates of data linkage                                                                                                |

\*Not assessed in cross-sectional studies
